# Supplementary material for: Living conditions, HIV and gender affirmation care pathways of transgender people living with HIV in France: a nationwide, comprehensive, cross-sectional, community-based research protocol (ANRS Trans&HIV)
Source: PubMed Central journal article supplement — BMJ Open. 2021 Dec 16;11(12):e052691. doi: 10.1136/bmjopen-2021-052691 (PMC8679115; doi:10.1136/bmjopen-2021-052691), 2021-12-16
Supplement: bmjopen-2021-052691supp001.pdf [file bmjopen-2021-052691supp001.pdf]

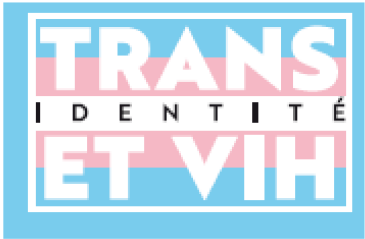

QUESTIONNAIRE FACE A FACE

MODULE HISTORIQUE RESIDENTIEL ..... 2

MODULE IDENTITE DE GENRE- ORIENTATION SEXUELLE..... 4

MODULE EMPLOI ET CONDITIONS DE VIE..... 6

MODULE DEPISTAGE ET HISTOIRE AVEC LE VIH..... 9

MODULE PARCOURS DE TRANSITION ..... 13

MODULE CONSOMMATIONS DE DROGUES ..... 17

MODULE ESTIME DE SOI ET SANTE MENTALE ..... 19

MODULE RELATIONS SOCIALES ET DISCRIMINATIONS ..... 21

MODULE VIE SEXUELLE ..... 26

## MODULE HISTORIQUE RESIDENTIEL

Merci d'avoir accepté de participer à cette enquête. Je suis [nom], enquêtrice et je vais à présent vous poser des questions sur votre vie, qui vont parfois, vous paraître très intimes. Ces informations ont pour but de bien comprendre vos conditions de vie et vos besoins afin d'améliorer les conditions de prise en charge des personnes trans séropositives. Vos réponses sont strictement confidentielles, et aucune information ne sera transmise à l'équipe médicale. Si vous le voulez bien, nous allons commencer.

**1. Quelle est votre année de naissance ?**

/\_\_/\_\_/\_\_/\_\_/année

### HISTORIQUE RESIDENTIEL ET ADMINISTRATIF

*Nous allons commencer par les pays où vous avez vécu, pendant au moins un an, depuis votre naissance jusqu'à maintenant.*

**2. Dans quel pays êtes-vous née ?**

*[Si née en France (DOM/TOM compris) ne pas poser les questions suivantes]*

**3. Quand êtes-vous arrivée en France ?**

*[Avoir le mois si l'arrivée est récente]*

**4. Avant la France dans quels pays/, avez-vous vécu ?**

**5. Quelle est votre nationalité ?**

**6. Quels ont été vos titres de séjours en arrivant en France ?**

*[Si Q2<>France] Nous allons parler maintenant de votre situation administrative.*

**7. Vous êtes arrivée en France ...**

- ☐ Seule
- ☐ Par l'intermédiaire de membres de votre famille
- ☐ Par l'intermédiaire d'autres personnes trans
- ☐ Par l'intermédiaire d'autres personnes non trans

**8. Avez-vous dû donner de l'argent à une personne pour pouvoir venir en France (en dehors des frais de voyage)**

*[Pour l'enquêteur : arrivée en France via réseau de traite ; passeurs, etc.]*

- ☐ Oui
- ☐ Non

**9. Quand vous êtes arrivée en France, c'était : (plusieurs réponses possibles)**

- ☐ Pour travailler
- ☐ Pour faire des études
- ☐ Pour échapper aux risques pour votre vie, votre liberté ou votre sécurité dans votre propre pays.
- ☐ Du fait de votre identité de genre
- ☐ Du fait de votre orientation sexuelle
- ☐ Pour commencer, continuer ou terminer votre parcours de transition
- ☐ Pour rejoindre votre famille
- ☐ Pour changer de vie
- ☐ Pour vous soigner
- ☐ Pour une autre raison : \_\_\_\_\_

**10. Depuis que vous êtes arrivée en France, avez-vous fait des voyages ou des séjours dans votre pays d'origine ?**

- ☐ Non, pas encore
- ☐ Oui, une fois
- ☐ Oui, plusieurs fois

**11. Est-ce que vos croyances personnelles religieuses occupent une place importante dans votre vie ?**

- ☐ Très importante
- ☐ Importante
- ☐ Pas très importante
- ☐ Pas importante du tout
- ☐ Non concernée (ne pas suggérer)

CONFIDENTIEL

## MODULE IDENTITE DE GENRE- ORIENTATION SEXUELLE

Je vais vous poser quelques questions sur votre identité de genre et votre orientation sexuelle.

**12. Comment qualifieriez-vous votre identité de genre ?**

- ☐ Trans/ personne trans
- ☐ Femme trans
- ☐ Femme
- ☐ Homme
- ☐ Agenre
- ☐ Non binaire
- ☐ Autre \_\_\_\_\_

**13. Comment qualifieriez-vous votre orientation sexuelle**

- ☐ Homosexuelle
- ☐ Hétérosexuelle
- ☐ Bisexuelle
- ☐ Asexuelle
- ☐ Pansexuelle
- ☐ Autre \_\_\_\_\_

**14. Actuellement, vous vous présentez dans votre genre souhaité :**

- ☐ Toujours
- ☐ Souvent
- ☐ Parfois
- ☐ Jamais

**15. Avez-vous au moins un papier d'identité correspondant à votre genre actuel (carte d'identité, passeport, permis de conduire etc.)?**

- ☐ Oui → Q16 ; Q17 ; Q18
- ☐ Non → Q19 ; Q20 ; Q21

**16. [Si oui] Où avez-vous effectué cette démarche ?**

- ☐ En France
- ☐ Dans votre pays de naissance
- ☐ Dans un autre pays

**17. Avez-vous rencontré des difficultés**

- ☐ Oui
- ☐ Non

**18. [Si oui] De quel ordre ?**

- ☐ Démarche longue
- ☐ Difficulté à fournir les documents demandés pour constituer le dossier
- ☐ Discrimination de la part du personnel administratif
- ☐ Autre : \_\_\_\_\_

**19. [Si non] Avez-vous entamé ces démarches ?**

- ☐ Oui
- ☐ Non

**20. [Si oui] Rencontrez-vous des difficultés ?**

- ☐ Oui
- ☐ Non

**21. [Si oui] De quel ordre ?**

- ☐ Démarche longue



- ☐ Difficulté à fournir les documents demandés pour constituer le dossier
- ☐ Discrimination de la part du personnel administratif
- ☐ Autre : \_\_\_\_\_

CONFIDENTIEL

## MODULE EMPLOI ET CONDITIONS DE VIE

### ACTIVITES PROFESSIONNELLES

A présent nous allons parler de vos conditions de vie et de l'emploi

**22. Quels ont été vos activités étudiantes et professionnelles depuis que vous avez 16 ans /fini le lycée (équivalent bac) ?**

**23. Quel est votre niveau d'étude ?**

- ☐ Pas scolarisé
- ☐ Primaire
- ☐ Secondaire
- ☐ Supérieur ou égal au baccalauréat

**24. Actuellement, quelle est votre situation vis-à-vis de l'emploi :(Cochez toutes les réponses qui correspondent à la situation)**

**Vous travaillez et vous avez :**

- ☐ Un emploi salarié stable (CDI, fonctionnaire, etc.)
- ☐ Une profession indépendante (patron, profession libérale, commerçant, artisan, artiste, etc.)
- ☐ Un emploi peu stable (CDD, intérim, vacataire)
- ☐ Un travail non déclaré

**Et / ou :**

- ☐ Vous avez une allocation chômage
- ☐ Vous êtes en congé de maladie depuis plus de 6 mois ou en invalidité
- ☐ Vous êtes en congé parental
- ☐ Vous êtes au foyer ou vous ne cherchez pas de travail
- ☐ Vous êtes à la retraite ou en préretraite
- ☐ Vous êtes étudiante
- ☐ Vous suivez une formation rémunérée
- ☐ Vous êtes apprentie ou en stage rémunéré
- ☐ Vous avez le RSA, l'AAH.
- ☐ Autres, précisez : \_\_\_\_\_

**Et / ou :**

- ☐ Vous vous considérez comme une travailleuse du sexe

**25. Vous est-il arrivé de chercher un emploi (déclaré) depuis que vous êtes en France.**

- ☐ Oui
- ☐ Non → Q28

**26. Au cours de cette recherche, vous trouviez:**

- ☐ Qu'on ne vous faisait pas confiance
- ☐ Qu'on vous posait des questions déplacées
- ☐ Qu'on vous ait refusé injustement un poste
- ☐ Aucune de ces propositions

**27. Selon vous c'était à cause de...**

- ☐ Vos origines ou votre nationalité
- ☐ Du fait que vous soyez une personne trans
- ☐ Votre séropositivité
- ☐ Votre façon de vous habiller
- ☐ Autres (à préciser) \_\_\_\_\_

**28. Actuellement quelle sécurité sociale avez-vous ?**

- ☐ Le régime général, un régime spécial ou assimilé [pour l'enquêteur : sécurité sociale des salariés]
- ☐ La PUMA (Protection Universelle Maladie)

- ☐ L'AME (Aide Médicale d'Etat)
- ☐ Autres : préciser
- ☐ Aucune prise en charge

**29. Avez-vous un revenu personnel, c'est-à-dire de l'argent que vous obtenez de votre travail (déclaré ou non) ou d'allocations (RSA, allocation chômage, API, etc.) et que pouvez utiliser comme vous l'entendez ?**

- ☐ Oui
- ☐ Non

**30. Pouvez-vous donner une estimation de vos revenus/ressources mensuels nets ?**

*[Consigne enquêteur : cochez le montant dans la grille suivante, ne citer que si aucune réponse spontanée]*

- ☐ Moins de 500 €
- ☐ De 500 à 1000 €
- ☐ 1001 à 2000 €
- ☐ De 2001 à 3000 €
- ☐ De 3001 à 5000 €
- ☐ Plus de 5000 €

**31. Vos revenus ont-ils été impactés par la crise du COVID-19 ?**

- ☐ Non, ils n'ont pas changés (j'ai perçu mes revenus normalement)
- ☐ Oui en partie, mais j'ai pu bénéficier d'aides sociales (chomages ; indemnités maladie etc.)
- ☐ Oui totalement, je n'avais plus aucune ressource

**32. Actuellement, diriez-vous plutôt que financièrement...**

- ☐ Vous ne pouvez pas y arriver sans faire de dettes
- ☐ Vous y arrivez difficilement
- ☐ C'est juste, il faut faire attention
- ☐ Ça va
- ☐ Vous êtes plutôt à l'aise
- ☐ Vous êtes vraiment à l'aise

**33. Au cours des 4 dernières semaines, vous est-il arrivé à vous ou à quelqu'un avec qui vous habitez de passer une journée complète sans prendre au moins un repas complet, par manque d'argent ?**

- ☐ Oui
- ☐ Non

**34. Au cours des 4 dernières semaines, vous est-il arrivé d'avoir recours à des repas gratuits/ tickets services dans une structure d'aide alimentaire ou associations (Restaurants du Cœur, Secours populaire, association trans ou lutte VIH etc.)**

- ☐ Oui
- ☐ Non

**35. Au cours des 4 dernières semaines, vous est-il arrivé d'avoir recours à une épicerie sociale ou solidaire ?**

*[Consigne enquêteur : c'est à dire une épicerie où les aliments sont vendus de 10 à 30% du prix du marché ?]*

- ☐ Oui
- ☐ Non

**36. (si au moins 1 oui à 44. 45.46) Cette situation est :**

- ☐ Récente et liée au COVID-19
- ☐ Ancienne et s'est aggravée avec le COVID-19
- ☐ Ancienne mais le COVID-19 n'a pas eu d'impact

#### LOGEMENT

*Nous allons maintenant parler du logement que vous avez pu avoir au cours de votre vie.*

**37. Depuis que vous avez quitté votre foyer familial, quel a été votre parcours vis-à-vis du logement ?**

**38. Actuellement, par rapport à votre habitation, vous êtes ?**

- ☐ Locataire
- ☐ Locataire d'un appartement médicalisé comme un ACT, un appartement relais
- ☐ Sous locataire
- ☐ Propriétaire de votre logement (ou accédant à la propriété)
- ☐ Vous vivez chez un.e ou des ami.e.s
- ☐ Vous vivez chez vos parents ou chez d'autres membres de votre famille
- ☐ Vous logez dans un foyer ou dans un centre d'hébergement
- ☐ Vous êtes sans domicile fixe (hôtel, etc.)

**39. Est-ce que vous vivez seul-e ?**

- ☐ Oui
- ☐ Non

**40. Estimez-vous que vos conditions actuelles de logement sont :**

- ☐ Très satisfaisantes
- ☐ Satisfaisantes
- ☐ Acceptables
- ☐ Insuffisantes
- ☐ Très insuffisantes

**41. Comment avez-vous vécu le confinement imposé dans le cadre du COVID-19 :**

- ☐ Extrêmement facile
- ☐ Très facile
- ☐ Facile
- ☐ Difficile
- ☐ Très difficile
- ☐ Extrêmement difficile

## MODULE DEPISTAGE ET HISTOIRE AVEC LE VIH

Nous allons parler à présent de votre histoire avec le VIH.

### DEPISTAGE

**42. En quelle année avez-vous eu votre premier test VIH positif ?**

**43. Où avez-vous été dépistée positive pour votre infection à VIH ?**

- ☐ En France
- ☐ Dans votre pays de naissance
- ☐ Dans un autre pays

**44. Avant ce test positif, aviez-vous déjà eu un test de dépistage négatif pour le VIH ?**

- ☐ Oui
- ☐ Non

**45. [Si oui] En quelle(s) année(s), avez-vous eu votre/vos test(s) négatif(s) ?**

### **DIAGNOSTIC ET DEPISTAGE**

**46. En quelle année avez-vous commencé un traitement contre VIH ?**

**47. Où êtes-vous suivie pour le VIH ?**

- ☐ Principalement, dans cet hôpital
- ☐ Principalement, dans un cabinet de médecine en ville
- ☐ Principalement, dans un autre hôpital
- ☐ Autant en ville qu'à l'hôpital

**48. Est-ce que vous prenez actuellement un traitement antirétroviral ?**

- ☐ Oui
- ☐ Non, pas actuellement mais vous avez déjà reçu un traitement dans le passé → Q57
- ☐ Non, pas actuellement et vous n'avez jamais reçu de traitement → Q58

**49. Au cours du dernier mois, vous est-il arrivé d'interrompre volontairement ou involontairement mais sans avis médical, votre traitement antirétroviral pendant plusieurs jours ?**

- ☐ Jamais
- ☐ Oui, une fois
- ☐ Oui, plusieurs fois

**50. Globalement, durant le dernier mois, vous diriez que vous avez suivi votre traitement antirétroviral ?**

- ☐ Très mal
- ☐ Mal
- ☐ Assez mal
- ☐ Assez bien
- ☐ Presque parfaitement
- ☐ Parfaitement

**51. Au cours de ces 4 derniers jours, vous est-il arrivé de sauter une ou plusieurs prises ?**

- ☐ Oui, une fois
- ☐ Oui, plusieurs fois
- ☐ Non Jamais

**52. Globalement, durant les 4 derniers jours, vous diriez que vous avez suivi votre traitement antirétroviral ?**

- ☐ Très mal

- ☐ Mal
- ☐ Assez mal
- ☐ Assez bien
- ☐ Presque parfaitement
- ☐ Parfaitement

**53. Pour vous, actuellement, les effets désagréables de votre traitement sont...**

- ☐ Inexistants
- ☐ Pas du tout gênants
- ☐ Peu gênants
- ☐ Assez gênants
- ☐ Très gênants

**54. Avez-vous rencontré une des situations suivantes lors du confinement pour suivre votre traitement (plusieurs réponses possibles)**

- ☐ Problèmes pour renouveler l'ordonnance
- ☐ Rupture de médicaments à la pharmacie
- ☐ Personnel médical indisponible dû au COVID-19
- ☐ Difficulté pour vous déplacer (transport en commun etc.)

**55. Depuis que vous avez commencé à prendre un traitement ARV, avez-vous déjà arrêté ce traitement pendant plus de 1 mois ?**

- ☐ Oui, au moins une fois
- ☐ Non, jamais → Q58
- ☐ Refus de répondre (ne pas citer)

**56. Pendant combien de temps ?**

- ☐ 1 à 3 mois
- ☐ 4 à 12 mois
- ☐ Plus de 12 mois
- ☐ Refus de répondre (ne pas citer)

**57. Pour quelle(s) raison(s) aviez-vous interrompu votre traitement ?**

- ☐ Le suivi médical étaient trop contraignants (vous ne pouviez pas venir tous les mois ou tous les 2 mois chercher les ARV)
- ☐ Le traitement n'était plus disponible à l'hôpital (rupture d'approvisionnement en ARV)
- ☐ Vous ressentiez trop d'effets secondaires
- ☐ Vous vous sentiez en bonne santé
- ☐ Vous voyagiez beaucoup d'un pays à l'autre
- ☐ Autre (précisez) : \_\_\_\_\_
- ☐ Refus de répondre (ne pas citer)

*Nous allons plus particulièrement parler de votre prise en charge dans cet hôpital.*

**58. Est-ce que vous trouvez le personnel soignant qui s'occupe de votre maladie (infection au VIH) à l'écoute de vos problèmes ? Indiquez sur cette échelle allant de 1 à 6, le chiffre le plus proche de ce que vous pensez. Le plus petit chiffre à gauche correspond à « Pas du tout à l'écoute » et le plus grand chiffre à droite à « Très à l'écoute ». (Entourer le chiffre indiqué par la personne ou 7 pour Non concerné si la personne n'a pas de surveillance médicale pour son infection au VIH)**

- ☐ 1. Pas du tout à l'écoute
- ☐ 2
- ☐ 3
- ☐ 4
- ☐ 5

☐ 6. Très à l'écoute

**59. En général, par rapport au(x) médecin(s) qui s'occupe(nt) de votre maladie (infection au VIH), vous lui (leur) faites :**

- ☐ Tout à fait confiance
- ☐ Un peu confiance
- ☐ Pas du tout confiance
- ☐ Non concerné (*le patient n'a pas de surveillance médicale pour son infection au VIH. Ne pas citer*)

**60. En général, par rapport à l'équipe soignante (hors médecins) qui s'occupe de votre maladie, vous lui faites :**

- ☐ Tout à fait confiance
- ☐ Un peu confiance
- ☐ Pas du tout confiance
- ☐ Non concerné (*la personne n'a pas de surveillance médicale pour son infection au VIH. Ne pas citer*)

**61. Avez-vous vécu des refus de soins par les professionnel.le.s de santé de cet hôpital ?**

- ☐ Non jamais
- ☐ Oui une fois
- ☐ Oui plusieurs fois

**62. [Si oui] Il a**

- ☐ Il a refusé de vous recevoir pour vous soigner
- ☐ Il vous a proposé des rendez-vous dans un délai anormalement long par rapport aux autres patients
- ☐ Il vous a orienté vers un ou un-e autre confrère ou un autre établissement de façon répétées et non-justifiées
- ☐ Il vous a pris en charge dans des conditions différentes des autres patients (tel qu'un RDV uniquement en fin de journée, une autre salle de consultation etc.)
- ☐ Autre : \_\_\_\_\_

**63. [Si oui] Pensez-vous que c'était à cause de ...**

- ☐ Vos origines ou votre nationalité
- ☐ Du fait que vous soyez une personne trans
- ☐ Votre séropositivité
- ☐ Votre façon de vous habiller
- ☐ Autre (à préciser)

**64. Etes-vous satisfaite de votre dernière consultation ?**

- ☐ Très satisfaite
- ☐ Satisfaite
- ☐ Insatisfaite
- ☐ Pas du tout satisfaite

**65. Sur une échelle de 1 à 6 comment évalueriez-vous votre suivi médical dans le service, pendant la période du COVID-19.**

- ☐ 1. Pas du tout satisfaisante
- ☐ 2
- ☐ 3
- ☐ 4
- ☐ 5
- ☐ 6. Très satisfaisante

*Nous allons à présent parler de votre prise en charge, en dehors du VIH et parcours de transition.*

66. **Au cours des 12 derniers mois, est-il arrivé qu'un.e médecin ou du personnel médical, hors VIH et parcours de transition, vous traite moins bien ou vous reçoive plus mal que les autres patients ?**
- ☐ Oui
  - ☐ Non
67. **[Si oui] C'était :**
- ☐ Un.e dentiste
  - ☐ Un.e médecin généraliste/médecin de ville
  - ☐ Un.e médecin spécialisé.e
  - ☐ Un.e autre spécialiste hospitalier.e
  - ☐ Autre \_\_\_\_\_
68. **[Si oui] Pensez-vous que c'était à cause de ...**
- ☐ Vos origines ou votre nationalité
  - ☐ Du fait que vous soyez une personne trans
  - ☐ Votre séropositivité
  - ☐ Votre façon de vous habiller
  - ☐ Parce que vous êtes à la PASS, à la PUMA ou à l'AME (pour soins)
  - ☐ Autre (à préciser)
69. **Au cours des 12 derniers mois, est-ce qu'un.e professionnel.le de santé a refusé de vous soigner ?**
- ☐ Oui
  - ☐ Non
70. **[Si oui] C'était :**
- ☐ Un.e dentiste
  - ☐ Un.e médecin généraliste/médecin de ville
  - ☐ Un.e médecin spécialisé.e
  - ☐ Un.e autre spécialiste hospitalier.e
  - ☐ Autre \_\_\_\_\_
71. **[Si oui] Pensez-vous que c'était à cause de ...**
- ☐ Vos origines ou votre nationalité
  - ☐ Du fait que vous soyez une personne trans
  - ☐ Votre séropositivité
  - ☐ Votre façon de vous habiller
  - ☐ Parce que vous êtes à la PASS, à la PUMA ou à l'AME (pour soins)
  - ☐ Autre (à préciser)
72. **D'une façon générale êtes-vous satisfaite de votre prise en charge par les médecins ou professionnels de santé, hors VIH et parcours de transition ?**
- ☐ Très satisfaite
  - ☐ Satisfaite
  - ☐ Insatisfaite
  - ☐ Pas du tout satisfaite



## MODULE PARCOURS DE TRANSITION

*Nous allons parler maintenant de votre parcours de transition.*

**73. A quel âge/ en quelle année, vous êtes-vous visibilisée/affirmée en tant que femme, pour la première fois (grille) ?**

**74. Par quel moyen ?**

- ☐ Maquillage
- ☐ Perruque/ cheveux long
- ☐ Prothèses amovibles
- ☐ Vêtements, chaussures (robes ; jupe ; talons etc.)
- ☐ Epilation
- ☐ Autre: \_\_\_\_\_

**75. Avez-vous réalisé des injections de silicone, d'huile etc.**

- ☐ Jamais
- ☐ Oui, une fois
- ☐ Oui, plusieurs fois

**76. [Si oui] Dans quel cadre avez-vous réalisé ces injections ?**

- ☐ Dans un cadre médical par du personnel médical
- ☐ Dans un cadre non médical par du personnel médical
- ☐ Dans un cadre non médical par du personnel non médical

**77. Nous allons noter dans la grille les années/ périodes de votre vie où vous avez réalisé des injections.**

**78. Avez-vous déjà pris des hormones féminisantes ?**

- ☐ Jamais → Q84
- ☐ Oui, il y a longtemps
- ☐ Oui, encore actuellement

**79. La première fois c'était :**

- ☐ La pilule contraceptive de votre mère ou d'une femme de votre entourage
- ☐ Une prescription médicale
- ☐ Une amie trans qui vous les avait données
- ☐ Un achat sur internet
- ☐ Un achat dans la rue
- ☐ Autre: \_\_\_\_\_

**80. Nous allons noter dans la grille les années/ périodes de votre vie où vous avez pris des hormones.**

**81. [Si Q78 = Oui, encore actuellement] D'une façon générale, qui vous les prescrit ?**

- ☐ Votre spécialiste VIH à l'hôpital
- ☐ Un.e médecin spécialiste privée (endocrinologue)
- ☐ Un.e médecin d'une équipe pluridisciplinaire des parcours trans
- ☐ Un.e autre médecin spécialiste à l'hôpital
- ☐ Un.e médecin de ville
- ☐ Personne, vous l'avez acheté sur internet ou dans la rue ou via d'autres personnes
- ☐ Autre

**82. [Si Q78 = Oui, encore actuellement] Effectuez-vous des contrôles biologiques de suivi/surveillance de votre traitement hormonal?**

- ☐ Oui

☐ Non

**83. Avez-vous eu des consultations avec un.e endocrinologue ?**

- ☐ Jamais
- ☐ Oui, il y a plus de 12 mois
- ☐ Oui, au cours des 12 derniers mois

**84. Avez-vous eu des consultations avec un.e psychiatre, ?**

- ☐ Jamais
- ☐ Oui, il y a plus de 12 mois
- ☐ Oui, au cours des 12 derniers mois

**85. Avez-vous effectué un parcours de transition physique (avec un accompagnement médical), en France**

- ☐ Oui
- ☐ Non mais vous l'envisagez → Q93
- ☐ Non → Q95

**86. Comment réalisez-vous (ou avez-vous réalisé) votre parcours de transition ?**

- ☐ Pluridisciplinaire hospitalière (soflect/fpath)
- ☐ Privé ou centre de santé (choix du parcours et des praticiens)
- ☐ Autogéré
- ☐ Autre : \_\_\_\_\_

*Nous allons plus particulièrement parler de votre prise en charge de votre parcours de transition.*

**87. Est-ce que vous trouvez le personnel soignant qui s'occupe de votre parcours de transition à l'écoute de vos problèmes ? Indiquez sur cette échelle allant de 1 à 6, le chiffre le plus proche de ce que vous pensez. Le plus petit chiffre à gauche correspond à « Pas du tout à l'écoute » et le plus grand chiffre à droite à « Très à l'écoute ». (Entourer le chiffre indiqué par la personne)**

- ☐ 1. Pas du tout à l'écoute
- ☐ 2
- ☐ 3
- ☐ 4
- ☐ 5
- ☐ 6. Très à l'écoute

**88. En général, par rapport au(x) médecin(s) qui s'occupe(nt) de votre parcours, vous lui (leur) faites :**

- ☐ Tout à fait confiance
- ☐ Un peu confiance
- ☐ Pas du tout confiance
- ☐ Non concernée

**89. En général, par rapport à l'équipe soignante (hors médecins) qui s'occupe de votre parcours, vous lui faites :**

- ☐ Tout à fait confiance
- ☐ Un peu confiance
- ☐ Pas du tout confiance
- ☐ Non concernée

**90. Avez-vous vécu des discriminations par les professionnel.le.s de santé du parcours ?**

- ☐ Non jamais
- ☐ Oui une fois
- ☐ Oui plusieurs fois

**91. [Si oui] Pensez-vous que c'était à cause de...**

- ☐ Vos origines ou votre nationalité

- ☐ Du fait que vous soyez une personne trans
- ☐ Votre séropositivité
- ☐ Votre façon de vous habiller
- ☐ Autres (à préciser) \_\_\_\_\_

**92. Quel est votre niveau de satisfaction par rapport à la prise en charge dans votre parcours de transition ?**

- ☐ Très satisfaite
- ☐ Satisfaite
- ☐ Peu satisfaite
- ☐ Pas satisfaite du tout

**93. Avez-vous déjà envisagé ou réalisé des opérations chirurgicales suivantes pour votre transition ?**

|               | Réalisé                  | Envisagé                 |
|---------------|--------------------------|--------------------------|
| Visage        | <input type="checkbox"/> | <input type="checkbox"/> |
| Pomme d'adam  | <input type="checkbox"/> | <input type="checkbox"/> |
| Seins         | <input type="checkbox"/> | <input type="checkbox"/> |
| Fesses        | <input type="checkbox"/> | <input type="checkbox"/> |
| Sexe          | <input type="checkbox"/> | <input type="checkbox"/> |
| Autre : _____ | <input type="checkbox"/> | <input type="checkbox"/> |

**94. Nous allons noter sur la grille les années où vous avez réalisé ces opérations**

**95. En comparant à l'époque où vous étiez identifiée homme, vous vous sentez aujourd'hui physiquement:**

- ☐ Beaucoup mieux
- ☐ Mieux
- ☐ Ni mieux ni moins bien
- ☐ Moins bien
- ☐ Beaucoup moins bien

**96. Et psychologiquement ?**

- ☐ Beaucoup mieux
- ☐ Mieux
- ☐ Ni mieux ni moins bien
- ☐ Moins bien
- ☐ Beaucoup moins bien

**97. En comparant à l'époque où vous étiez identifiée homme, lors de vos rapports sexuels aujourd'hui vous avez :**

- ☐ Beaucoup plus de plaisir
- ☐ Plus de plaisir
- ☐ Ni plus ni moins de plaisir
- ☐ Moins de plaisir
- ☐ Beaucoup moins de plaisir

**98. Toujours par rapport à l'époque où vous étiez identifiée homme, le nombre de rapports sexuels que vous avez aujourd'hui sont :**

- ☐ Beaucoup plus nombreux
- ☐ Plus nombreux
- ☐ Ni plus ni moins nombreux
- ☐ Moins de nombreux
- ☐ Beaucoup moins nombreux

CONFIDENTIEL

## MODULE CONSOMMATIONS DE DROGUES

*Nous allons maintenant parler de votre consommation de produits*

**99. Avez-vous déjà fumé (tabac) ?**

- ☐ Non, jamais → Q102
- ☐ Oui mais j'ai arrêté → Q102
- ☐ Oui, et je fume encore aujourd'hui

**100. Combien de paquets par jour :**

- ☐ Moins d'un paquet
- ☐ De 1 à 2 paquet
- ☐ Plus de 2 paquets

**101. Votre consommation a-t-elle changé au cours du confinement**

- ☐ Elle a diminuée
- ☐ Elle est identique
- ☐ Elle a augmenté

**102. A quelle fréquence buvez-vous de l'alcool ?**

- ☐ Vous ne buvez jamais d'alcool → Q107
- ☐ 1 fois par mois ou moins
- ☐ 2 à 4 fois par mois
- ☐ 2 à 3 fois par semaine
- ☐ Au moins 4 fois par semaine

**103. Combien de verres contenant de l'alcool consommez-vous un jour typique où vous buvez ?**

- ☐ 1 ou 2
- ☐ 3 ou 4
- ☐ 5 ou 6
- ☐ 7, 8 ou 9
- ☐ 10 ou plus

**104. Avec quelle fréquence buvez-vous six verres ou davantage lors d'une occasion particulière ?**

- ☐ Jamais
- ☐ Moins d'une fois par mois
- ☐ Une fois par mois
- ☐ Une fois par semaine
- ☐ Tous les jours ou presque

**105. A quel âge avez-vous commencé à boire ? \_\_\_\_ ans**

**106. Votre consommation a-t-elle changé au cours du confinement**

- ☐ Elle a diminuée
- ☐ Elle est identique
- ☐ Elle a augmenté

**107. Au cours du dernier mois, avez-vous déjà consommé des drogues illicites ou des médicaments détournés ?**

- ☐ Oui
- ☐ Non → Q114

## 108. Avez-vous consommé du :

|                                                                                 | <i>Jamais</i>            | <i>rarement</i>          | <i>souvent</i>           | <i>Tous les jours ou presque</i> |
|---------------------------------------------------------------------------------|--------------------------|--------------------------|--------------------------|----------------------------------|
| <b>Cannabis</b>                                                                 |                          |                          |                          |                                  |
| Viagra® / Kamagra® / Cialis®                                                    | <input type="checkbox"/> | <input type="checkbox"/> | <input type="checkbox"/> | <input type="checkbox"/>         |
| Poppers                                                                         | <input type="checkbox"/> | <input type="checkbox"/> | <input type="checkbox"/> | <input type="checkbox"/>         |
| GHB/GBL                                                                         | <input type="checkbox"/> | <input type="checkbox"/> | <input type="checkbox"/> | <input type="checkbox"/>         |
| Cocaïne/ Crack/ Free-base                                                       | <input type="checkbox"/> | <input type="checkbox"/> | <input type="checkbox"/> | <input type="checkbox"/>         |
| Kétamine/ LSD/ Hallucinogènes                                                   | <input type="checkbox"/> | <input type="checkbox"/> | <input type="checkbox"/> | <input type="checkbox"/>         |
| Héroïne/ Morphine (Tramadol® ; Codeine®)                                        | <input type="checkbox"/> | <input type="checkbox"/> | <input type="checkbox"/> | <input type="checkbox"/>         |
| Amphétamines ou Méta-amphétamines (Speed/Crystal/ Ecstasy/MDMA)                 | <input type="checkbox"/> | <input type="checkbox"/> | <input type="checkbox"/> | <input type="checkbox"/>         |
| Nouvelles Drogues de Synthèse (Cathinones/ (Méphédronne/ 3MMC/ MDPV/NRJ3/4-MEC) | <input type="checkbox"/> | <input type="checkbox"/> | <input type="checkbox"/> | <input type="checkbox"/>         |
| Benzodiazépines ou hypnotiques (Valium®, Lexomil®, Xanax® ; Stilnox® etc. )     | <input type="checkbox"/> | <input type="checkbox"/> | <input type="checkbox"/> | <input type="checkbox"/>         |
| Autres. Précisez : .....                                                        | <input type="checkbox"/> | <input type="checkbox"/> | <input type="checkbox"/> | <input type="checkbox"/>         |

## 109. Votre consommation a-t-elle changé au cours du confinement

- ☐ Elle a diminuée  
☐ Elle est identique  
☐ Elle a augmenté

## 110. En avez-vous déjà consommé dans un contexte sexuel ?

- ☐ Oui  
☐ Non

## 111. Vous êtes-vous injecté des drogues ne serait-ce qu'une seule fois dans votre vie, même il y a longtemps ?

- ☐ Oui  
☐ Non

## 112. [Si oui] Quel âge aviez-vous cette toute première fois ?

## 113. [Si Héroïne/ Morphine (Tramadol® ; Codeine®)] Suivez-vous un traitement de substitution liée à la consommation de produits ?

- ☐ Oui  
☐ Non

## MODULE ESTIME DE SOI ET SANTE MENTALE

*Nous allons parler plus particulièrement de l'image que vous avez de vous-même.*

114. Dites-moi si vous êtes en accord ou non avec les affirmations suivantes.

|                                                                                     | Tout à fait en désaccord | Plutôt en désaccord      | Plutôt en accord         | Tout à fait en accord    |
|-------------------------------------------------------------------------------------|--------------------------|--------------------------|--------------------------|--------------------------|
| Je pense que je suis une personne de valeur, au moins égale à n'importe qui d'autre | <input type="checkbox"/> | <input type="checkbox"/> | <input type="checkbox"/> | <input type="checkbox"/> |
| Je pense que je possède un certain nombre de belles qualités                        | <input type="checkbox"/> | <input type="checkbox"/> | <input type="checkbox"/> | <input type="checkbox"/> |
| Tout bien considéré, je suis portée à me considérer comme une ratée                 | <input type="checkbox"/> | <input type="checkbox"/> | <input type="checkbox"/> | <input type="checkbox"/> |
| Je suis capable de faire les choses aussi bien que la majorité des gens             | <input type="checkbox"/> | <input type="checkbox"/> | <input type="checkbox"/> | <input type="checkbox"/> |
| Je ressens peu de raisons d'être fière de moi                                       | <input type="checkbox"/> | <input type="checkbox"/> | <input type="checkbox"/> | <input type="checkbox"/> |
| J'ai une attitude positive vis-à-vis de moi-même                                    | <input type="checkbox"/> | <input type="checkbox"/> | <input type="checkbox"/> | <input type="checkbox"/> |
| Dans l'ensemble, je suis satisfaite de moi                                          | <input type="checkbox"/> | <input type="checkbox"/> | <input type="checkbox"/> | <input type="checkbox"/> |
| J'aimerais avoir plus de respect pour moi-même                                      | <input type="checkbox"/> | <input type="checkbox"/> | <input type="checkbox"/> | <input type="checkbox"/> |
| Parfois je me sens vraiment inutile                                                 | <input type="checkbox"/> | <input type="checkbox"/> | <input type="checkbox"/> | <input type="checkbox"/> |
| Il m'arrive de penser que je suis une bonne à rien                                  | <input type="checkbox"/> | <input type="checkbox"/> | <input type="checkbox"/> | <input type="checkbox"/> |

115. A quel point vous sentez-vous féminine ?

- ☐ Très féminine
- ☐ Moyennement féminine
- ☐ Peu féminine
- ☐ Pas du tout féminine

116. A quel point vous sentez-vous séduisante ?

- ☐ Très séduisante
- ☐ Moyennement séduisante
- ☐ Peu séduisante
- ☐ Pas du tout séduisante

*Nous allons maintenant vous poser des questions sur votre moral.*

117. Au cours des 2 dernières semaines, selon quelle fréquence avez-vous été gênée par les problèmes suivants

|                                                  | Jamais                   | Plusieurs jours          | Plus de la moitié du temps | Presque tous les jours   |
|--------------------------------------------------|--------------------------|--------------------------|----------------------------|--------------------------|
| Peu d'intérêt ou de plaisir à faire les choses   | <input type="checkbox"/> | <input type="checkbox"/> | <input type="checkbox"/>   | <input type="checkbox"/> |
| Etre triste, déprimée ou désespérée              | <input type="checkbox"/> | <input type="checkbox"/> | <input type="checkbox"/>   | <input type="checkbox"/> |
| Difficultés à s'endormir ou à rester endormie ou | <input type="checkbox"/> | <input type="checkbox"/> | <input type="checkbox"/>   | <input type="checkbox"/> |

|                                                                                                                                                                                 |                          |                          |                          |                          |
|---------------------------------------------------------------------------------------------------------------------------------------------------------------------------------|--------------------------|--------------------------|--------------------------|--------------------------|
| <b>dormir trop</b>                                                                                                                                                              |                          |                          |                          |                          |
| <b>Se sentir fatiguée ou manquer d'énergie</b>                                                                                                                                  | <input type="checkbox"/> | <input type="checkbox"/> | <input type="checkbox"/> | <input type="checkbox"/> |
| <b>Avoir peu d'appétit ou manger trop</b>                                                                                                                                       | <input type="checkbox"/> | <input type="checkbox"/> | <input type="checkbox"/> | <input type="checkbox"/> |
| <b>Avoir une mauvaise opinion de soi-même ou avoir le sentiment d'être nulle ou d'avoir déçu sa famille ou s'être déçue soi-même</b>                                            | <input type="checkbox"/> | <input type="checkbox"/> | <input type="checkbox"/> | <input type="checkbox"/> |
| <b>Avoir du mal à se concentrer, par exemple, pour lire le journal ou regarder la télévision</b>                                                                                | <input type="checkbox"/> | <input type="checkbox"/> | <input type="checkbox"/> | <input type="checkbox"/> |
| <b>Bouger ou parler si lentement que les autres auraient pu le remarquer. Ou au contraire, être si agitée que vous avez eu du mal à tenir en place par rapport à d'habitude</b> | <input type="checkbox"/> | <input type="checkbox"/> | <input type="checkbox"/> | <input type="checkbox"/> |
| <b>Penser qu'il vaudrait mieux mourir ou envisager de vous faire du mal d'une manière ou d'une autre</b>                                                                        | <input type="checkbox"/> | <input type="checkbox"/> | <input type="checkbox"/> | <input type="checkbox"/> |

118. *[Si au moins un des problèmes coché]* A quel point cela a-t-il rendu votre travail, ou vos tâches à la maison ou votre capacité à vous entendre avec les autres, difficile(s) ?

- ☐ Pas du tout difficile
- ☐ Assez difficile
- ☐ Très difficile
- ☐ Extrêmement difficile

119. Au cours de votre vie, avez-vous déjà pensé au suicide ?

- ☐ Oui
- ☐ Non → Q125

120. *[Si oui]* Y avez-vous pensé au cours des 12 derniers mois ?

- ☐ Oui
- ☐ Non

121. Au cours de votre vie, vous est-il arrivé de faire des projets de suicide ?

- ☐ Oui
- ☐ Non

122. *[Si oui]* En quelle(s) année(s) est-ce arrivé ?

123. Avez-vous déjà fait une tentative de suicide ?

- ☐ Oui
- ☐ Non

124. *[Si oui]* En quelle(s) année(s) est-ce arrivé ?



## MODULE RELATIONS SOCIALES ET DISCRIMINATIONS

*Nous allons maintenant parler plus particulièrement de vos relations avec votre entourage.*

**125. Combien avez-vous d'ami.e.s proches c'est-à-dire des personnes avec qui vous êtes bien et à qui vous pouvez parler de choses personnelles ?**

/ \_\_\_\_ /

**126. Et parmi ces ami.e.s, combien en avez-vous vus ou avec combien avez-vous échangé par téléphone, réseaux sociaux, ou mails dans les deux dernières semaines ?**

/ \_\_\_\_ /

**127. Et parmi vos ami.e.s proches, combien connaissent votre séropositivité ?**

/ \_\_\_\_ /

**128. Pour chacune des personnes que je vais vous citer, je vais vous demander si elles savent ou non que vous êtes une femme Trans séropositive. Pour les personnes qui le savent, je vais ensuite vous demander si cela est accepté ou pas.**

**Votre partenaire principal :**

- Sait que vous êtes une femme trans
  - ☐ Oui
  - ☐ Non
- Sait que vous êtes séropositive
  - ☐ Oui
  - ☐ Non
- Accepte que vous soyez une femme trans
  - ☐ Oui
  - ☐ Non
- Accepte votre séropositivité
  - ☐ Oui
  - ☐ Non

**Votre Père :**

- Sait que vous êtes une femme trans
  - ☐ Oui
  - ☐ Non
- Sait que vous êtes séropositive
  - ☐ Oui
  - ☐ Non
- Accepte que vous soyez une femme trans
  - ☐ Oui
  - ☐ Non
- Accepte votre séropositivité
  - ☐ Oui
  - ☐ Non

**Votre Mère :**

- Sait que vous êtes une femme trans
  - ☐ Oui
  - ☐ Non
- Sait que vous êtes séropositive
  - ☐ Oui
  - ☐ Non
- Accepte que vous soyez une femme trans

- ☐ Oui
- ☐ Non
- Accepte votre séropositivité
  - ☐ Oui
  - ☐ Non

**Vos frères ou sœurs :**

- Savent que vous êtes une femme trans
  - ☐ Tous
  - ☐ La plupart
  - ☐ Un petit nombre
  - ☐ Aucun
- Savent que vous êtes séropositive
  - ☐ Tous
  - ☐ La plupart
  - ☐ Un petit nombre
  - ☐ Aucun
- Acceptent que vous soyez une femme trans
  - ☐ Tous
  - ☐ La plupart
  - ☐ Un petit nombre
  - ☐ Aucun
- Acceptent votre séropositivité
  - ☐ Tous
  - ☐ La plupart
  - ☐ Un petit nombre
  - ☐ Aucun

**Vos enfants :**

- Savent que vous êtes une femme trans
  - ☐ Tous
  - ☐ La plupart
  - ☐ Un petit nombre
  - ☐ Aucun
- Savent que vous êtes séropositive
  - ☐ Tous
  - ☐ La plupart
  - ☐ Un petit nombre
  - ☐ Aucun
- Acceptent que vous soyez une femme trans
  - ☐ Tous
  - ☐ La plupart
  - ☐ Un petit nombre
  - ☐ Aucun
- Acceptent votre séropositivité
  - ☐ Tous
  - ☐ La plupart
  - ☐ Un petit nombre
  - ☐ Aucun

*Nous allons maintenant parler plus particulièrement de vos expériences avec votre entourage à propos de votre infection VIH.*

**129. Actuellement, y a-t-il quelqu'un sur qui vous pouvez compter face à une situation difficile, un problème ?**

- ☐ Oui
- ☐ Non

**130. [Si oui] Est-ce :**

- ☐ Un.e membre de la famille
- ☐ Un.e ami.e.s Trans
- ☐ Un.e ami.e.s non Trans
- ☐ Une association
- ☐ Autre

**131. Au cours des 12 derniers mois, avez-vous reçu le soutien dont vous aviez besoin pour affronter les situations difficiles ou vous remonter le moral ?**

- ☐ Oui
- ☐ Oui, mais pas assez
- ☐ Non
- ☐ Non concernée (pas besoin de soutien)

**132. [Si oui] Est-ce : [plusieurs réponses possibles]**

- ☐ Un.e membre de la famille
- ☐ Des ami.e.s Trans
- ☐ Des ami.e.s non Trans
- ☐ Une association
- ☐ Autre

**133. Au cours des 12 derniers mois, avez-vous reçu de l'aide matérielle (argent, tâches quotidiennes, etc.) dont vous aviez besoin ?**

- ☐ Oui
- ☐ Oui mais pas assez
- ☐ Non
- ☐ Non concernée (pas besoin d'aide)

**134. [Si oui] Est-ce : [plusieurs réponses possibles]**

- ☐ Un.e membre de la famille
- ☐ Des ami.e.s Trans
- ☐ Des ami.e.s non Trans
- ☐ Une association
- ☐ Autre

**135. Est-ce que vous vous sentez- seule**

- ☐ Oui
- ☐ Non

*Nous allons maintenant parler des circonstances dans lesquelles il a pu arriver que quelqu'un vous manque d'égards, vous parle mal ou vous traite de façon injuste ou déplacée*

**136. Au cours 12 derniers mois, est-il arrivé qu'on vous traite mal dans votre famille ?**

- ☐ Oui
- ☐ Non

**137. [Si oui] Pensez-vous que c'était à cause de...**

- ☐ Vos origines ou votre nationalité
- ☐ Du fait que vous soyez une personne trans
- ☐ Votre séropositivité
- ☐ Votre façon de vous habiller
- ☐ Autres (à préciser) \_\_\_\_\_

138. Au cours 12 derniers mois, est-il arrivé qu'on vous traite mal dans la rue ?

- ☐ Oui
- ☐ Non

139. [Si oui] Pensez-vous que c'était à cause de...

- ☐ Vos origines ou votre nationalité
- ☐ Du fait que vous soyez une personne trans
- ☐ Votre séropositivité
- ☐ Votre façon de vous habiller
- ☐ Autres (à préciser) \_\_\_\_\_

140. Au cours 12 derniers mois, est-il arrivé qu'on vous traite mal dans l'administration (poste, préfecture, assurance, prison etc.) ?

- ☐ Oui
- ☐ Non

141. [Si oui] Pensez-vous que c'était à cause de...

- ☐ Vos origines ou votre nationalité
- ☐ Du fait que vous soyez une personne trans
- ☐ Votre séropositivité
- ☐ Votre façon de vous habiller
- ☐ Autres (à préciser) \_\_\_\_\_

142. Au cours des 12 derniers mois, dans la vie de tous les jours, à quelle fréquence vous est-il arrivé que quelqu'un vous appelle monsieur ?

- ☐ Jamais → Q144
- ☐ Rarement
- ☐ Souvent
- ☐ Toujours

143. Généralement par :

- ☐ Du personnel médical
- ☐ Des passant.e.s
- ☐ [Si Q24 = « se considère comme travailleuse du sexe »] Des client.e.s
- ☐ Des partenaires sexuels
- ☐ Du personnel de l'administration – préfecture ; poste ; banque etc.
- ☐ Des représentant.e.s de l'ordre
- ☐ Autre \_\_\_\_\_

144. Vous est-il déjà arrivé de vous faire, insulter, agresser verbalement ?

- ☐ Oui dans les 12 derniers mois
- ☐ Oui il y a plus de 12 mois
- ☐ Non

145. [Si oui] C'était :

- ☐ [Si Q24 = « se considère comme travailleuse du sexe »] Des client.e.s
- ☐ Des partenaires sexuels
- ☐ Des représentant.e.s de l'ordre
- ☐ Des passant.e.s
- ☐ Des ami.e.s
- ☐ Des membres de la famille
- ☐ Autre \_\_\_\_\_

146. Vous est-il déjà arrivé de vous faire agresser physiquement ?

- ☐ Oui dans les 12 derniers mois

- ☐ Oui il y a plus de 12 mois
- ☐ Non → Q151

**147. [Si oui] C'était :**

- ☐ [Si Q24 = « se considère comme travailleuse du sexe »] Des client.e.s
- ☐ Des partenaires sexuels
- ☐ Des représentant.e.s de l'ordre
- ☐ Des passant.e.s
- ☐ Des ami.e.s
- ☐ Des membres de la famille
- ☐ Autre \_\_\_\_\_

**148. [Si Q143 = OUI ou Q146 = OUI] Avez-vous fait des démarches légales suite à ces comportements ?**

- ☐ Oui
- ☐ Non

**149. [Si oui] Qu'avez-vous fait ?**

- ☐ Vous avez porté plainte
- ☐ Vous avez déposé une main courante
- ☐ Vous êtes avez consulté une association afin de saisir le Défenseur des Droits.
- ☐ Vous avez déposé votre dossier chez un avocat, un médiateur

**150. [Si Q143 = OUI ou Q146 = OUI] Nous allons noter dans la grille les périodes de votre vie où vous avez subi des violences qu'elles soient physiques ou psychologique**

## MODULE VIE SEXUELLE

*Je vais maintenant vous poser des questions plus personnelles. Certaines questions vont vous paraître très intimes, mais comme je vous l'ai dit, cette enquête est strictement confidentielle et anonyme. Il se peut que certaines questions ne vous concernent pas directement, dites-le-moi simplement.*

**151. Quel âge aviez-vous lors de votre premier rapport sexuel (consenti ou non) ?**

/\_\_/\_/ ans

**152. Avez-vous déjà subi des abus sexuels ?**

- ☐ Oui
- ☐ Non

**153. [Si oui] A quel âge la première fois ?**

/\_\_/\_/ ans

**154. Au cours de votre vie, avec combien de partenaires différent.e.s avez-vous eu des relations sexuelles (en dehors des clients si travail du sexe) ?**

Combien d'hommes (cis et trans) :

- ☐ 0
- ☐ 1
- ☐ 2-5
- ☐ 6-10
- ☐ 11-20
- ☐ 21-50
- ☐ 50-100
- ☐ 100-500
- ☐ Plus de 500

Combien de femmes (cis et Trans) :

- ☐ 0
- ☐ 1
- ☐ 2-5
- ☐ 6-10
- ☐ 11-20
- ☐ 21-50
- ☐ 50-100
- ☐ 100-500
- ☐ Plus de 500

**155. Comment qualifieriez-vous votre vie sexuelle actuelle ?**

- ☐ Satisfaisante
- ☐ Plutôt satisfaisante
- ☐ Plutôt pas satisfaisante
- ☐ Pas satisfaisante

**156. Durant le dernier mois, vous est-il arrivé d'avoir des fuites involontaires de selles ?**

- ☐ Oui
- ☐ Non

**157. Au cours du dernier mois, avez-vous eu une pénétration anale passive (sodomie) ?**

- ☐ Aucune pénétration passive
- ☐ Mois de 10
- ☐ De 10 à 50
- ☐ Plus de 50

### TRAVAIL DU SEXE

**158. Au cours de votre vie, avez-vous eu des rapports sexuels tarifés :**

- ☐ Oui
- ☐ Non

**159. [Si non] Toujours au cours de votre vie, vous est-il déjà arrivé de recevoir un hébergement, un service, des biens matériels ou des cadeaux en échange de relations érotiques ou sexuelles ?**

- ☐ Oui, une fois
- ☐ Oui, plusieurs fois
- ☐ Jamais

160. [Si oui] La dernière fois vous avez reçu :

- ☐ De l'argent
- ☐ Un hébergement
- ☐ Un service
- ☐ Des biens matériels ou cadeaux (précisez)

[Si Q158 = NON -> Q174]

161. Nous allons noter dans la grille toutes les périodes où vous avez eu des relations tarifées et tout d'abord l'âge que vous aviez la première fois ?

162. En général, vous trouvez vos client.e.s :

- ☐ Sur des sites spécialisés, sur Internet
- ☐ Sur des lieux extérieurs (rue, parc, bois etc.)
- ☐ Sur des applications spécialisées
- ☐ Par le bouche à oreille

163. [Si rencontre sur internet/application] La dernière fois que vous avez rencontré un client par internet, avez-vous eu un rapport physique avec lui ?

- ☐ Oui
- ☐ Non

164. En général, la plupart de vos rapports sexuels tarifés ont lieu [Une seule réponse possible] :

- ☐ Chez vous
- ☐ Dans un hôtel
- ☐ Dans un lieu partagé avec d'autres travailleur.se.s du sexe
- ☐ Au domicile du/de la client.e
- ☐ Dans un véhicule
- ☐ A l'extérieur

165. Au cours des 4 dernières semaines, combien avez-vous eu de rapports sexuels tarifés avec des client.e.s

- ☐ Aucun → Q169
- ☐ 1 à 10 rapports sexuels
- ☐ 10 à 50 rapports sexuels
- ☐ 50 à 100 rapports sexuels
- ☐ Plus de 100 rapports sexuels

166. Au cours des 4 dernières semaines, concernant vos relations sexuelles avec vos client.e.s

|                                        | Jamais                   | Rarement                 | Souvent                  | Toujours                 |
|----------------------------------------|--------------------------|--------------------------|--------------------------|--------------------------|
| Avez-vous été pénétrée par vos clients | <input type="checkbox"/> | <input type="checkbox"/> | <input type="checkbox"/> | <input type="checkbox"/> |
| Avez-vous pénétré vos clients          | <input type="checkbox"/> | <input type="checkbox"/> | <input type="checkbox"/> | <input type="checkbox"/> |

167. Toujours au cours des 4 dernières semaines, lors de ces relations sexuelles avec vos client.e.s, avez-vous utilisé :

|                   | Jamais                   | Rarement                 | Souvent                  | Presque toujours         | Toujours                 |
|-------------------|--------------------------|--------------------------|--------------------------|--------------------------|--------------------------|
| Le préservatif    | <input type="checkbox"/> |
| Le gel lubrifiant | <input type="checkbox"/> |

168. Au cours des 4 dernières semaines, l'usage du préservatif a-t-il été un sujet de négociation avec vos client.e.s ? (Exemple ceux qui seraient prêts à payer plus pour avoir un rapport sans préservatif)

- ☐ Oui, tout le temps
- ☐ Oui, quelques fois
- ☐ Oui, rarement
- ☐ Non, pas du tout

169. Est-il déjà arrivé qu'un.e client.e vous menace ou exerce une pression psychologique sur vous, pour

**avoir des relations sexuelles avec vous ou qu'il vous impose des gestes sexuels que vous refusez ?**

- ☐ C'est arrivé dans les 12 derniers mois
- ☐ C'est arrivé il y a plus de 12 mois
- ☐ Non, jamais

**170. Est-il déjà arrivé qu'un.e client.e utilise la force physique pour avoir des relations sexuelles avec vous ou qu'il vous impose des gestes sexuels que vous refusez ?**

- ☐ C'est arrivé dans les 12 derniers mois
- ☐ C'est arrivé il y a plus de 12 mois
- ☐ Non, jamais

**171. Concernant votre travail du sexe**

- ☐ Vous êtes à votre propre compte et travaillez seule
- ☐ Vous êtes à votre compte mais vous payez d'autres personnes pour votre sécurité et/ou déplacements
- ☐ Vous devez rendre des comptes à une autre personne
- ☐ Vous travaillez en communauté et partagez les frais et les rentrées avec d'autres

**172. Sur une échelle allant de 1 à 6, le travail du sexe est pour vous quelque chose d'occasionnel (1) à régulier (6) le chiffre le plus proche de ce que vous pensez. Le plus petit chiffre à gauche correspond à « quelque chose d'occasionnel » et le plus grand chiffre à droite à « quelque chose de régulier ». [Entourer le chiffre indiqué par la personne]**

- ☐ 1. D'occasionnel
- ☐ 2
- ☐ 3
- ☐ 4
- ☐ 5
- ☐ 6. De régulier

**173. Au cours de la période de confinement lors de l'épidémie de Covid-19, avez-vous eu**

- ☐ Autant de relations sexuelles avec des clients que d'habitude
- ☐ Un peu moins de relations sexuelles avec des clients que d'habitude
- ☐ Beaucoup moins de relations sexuelles avec des clients que d'habitude
- ☐ Plus aucune relations sexuelles avec des clients

#### PARTENAIRES RECREATIFS

*Je vais vous poser quelques questions sur les partenaires sexuels que vous voyez de manière récréative, si vous en avez, et en dehors des éventuelles relations tarifées.*

**174. Au cours des 3 derniers mois, combien de relations sexuelles avez-vous eues avec un/des partenaire(s) récréatif(s) ?**

- ☐ Aucun → Q177
- ☐ 1 à 4 rapports sexuels
- ☐ 5 à 8 rapports sexuels
- ☐ 9 à 12 rapports sexuels
- ☐ 13 à 16 rapports sexuels
- ☐ Plus de 16 rapports sexuels



175. Au cours des 3 derniers mois, concernant vos relations sexuelles, avec vos partenaires récréatifs :

|                                                                     | Jamais                   | Rarement                 | Souvent                  | Toujours                 |
|---------------------------------------------------------------------|--------------------------|--------------------------|--------------------------|--------------------------|
| Avez-vous été pénétrée par votre (vos) partenaire(s) occasionnel(s) | <input type="checkbox"/> | <input type="checkbox"/> | <input type="checkbox"/> | <input type="checkbox"/> |
| Avez-vous pénétré votre (vos) partenaire(s) occasionnel(s)          | <input type="checkbox"/> | <input type="checkbox"/> | <input type="checkbox"/> | <input type="checkbox"/> |

176. Au cours des 3 derniers mois, lors de ces relations sexuelles récréatives avez-vous utilisé :

|                   | Jamais                   | Rarement                 | Souvent                  | Presque toujours         | Toujours                 |
|-------------------|--------------------------|--------------------------|--------------------------|--------------------------|--------------------------|
| Le préservatif    | <input type="checkbox"/> |
| Le gel lubrifiant | <input type="checkbox"/> |

177. Est-il déjà arrivé qu'un partenaire récréatif vous menace ou exerce une pression psychologique sur vous, pour avoir des relations sexuelles avec vous ou qu'il vous impose des gestes sexuels que vous refusiez ?

- ☐ C'est arrivé dans les 12 derniers mois
- ☐ C'est arrivé il y a plus de 12 mois
- ☐ Non, jamais

178. Est-il déjà arrivé qu'un.e partenaire récréatif utilise la force physique pour avoir des relations sexuelles avec vous ou qu'il vous impose des gestes sexuels que vous refusiez ?

- ☐ C'est arrivé dans les 12 derniers mois
- ☐ C'est arrivé il y a plus de 12 mois
- ☐ Non, jamais

#### PARTENAIRE AMOUREUX

*Nous allons à présent parler des partenaires amoureux que vous avez pu avoir au cours de votre vie. Il s'agit des relations qui ont compté pour vous.*

179. Nous allons noter sur la grille les différents partenaires amoureux que vous avez pu avoir.

180. Actuellement, avez-vous un partenaire que vous considérez comme votre partenaire principal.e, que vous ayez eu des rapports sexuels ou non ?

- ☐ Oui
- ☐ Non → *Fin du questionnaire*

181. *[Si oui]* C'est :

- ☐ Un homme cis
- ☐ Un homme trans
- ☐ Une femme cis
- ☐ Une femme trans

182. Depuis quand êtes-vous ensemble ?

\_\_\_\_/\_\_\_\_ (mois/année)

183. Vivez-vous ensemble sous le même toit ?

- ☐ Oui
- ☐ Non

184. Connaissez-vous le statut VIH de votre partenaire principal.e?

- ☐ Oui, il/elle est séropositif.ve avec une charge virale indétectable
- ☐ Oui, il/elle est séropositif.ve avec une charge virale détectable
- ☐ Oui, il/elle est séronégatif.ve
- ☐ Non, vous ne connaissez pas son statut sérologique

**185. Et votre partenaire principal.e, connaît-il/elle votre statut VIH ?**

- ☐ Oui, il/elle sait que vous êtes séropositive
- ☐ Non, il/elle ne le connaît pas
- ☐ Vous ne savez pas s'il/elle connaît votre statut

**186. Au cours des 3 derniers mois, avez-vous eu des rapports sexuels avec votre partenaire principal.e ?**

- ☐ Oui
- ☐ Non

**187. Au cours des 3 dernier mois, combien de relations sexuelles avez-vous eues avec votre partenaire principal ?**

- ☐ Aucun
- ☐ 1 à 4 rapports sexuels
- ☐ 5 à 8 rapports sexuels
- ☐ 9 à 12 rapports sexuels
- ☐ 13 à 16 rapports sexuels
- ☐ Plus de 16 rapports sexuels

**188. Au cours des 3 derniers mois, concernant vos relations sexuelles :**

|                                                    | Jamais                   | Rarement                 | Souvent                  | Toujours                 |
|----------------------------------------------------|--------------------------|--------------------------|--------------------------|--------------------------|
| <b>Avez-vous été pénétrée par votre partenaire</b> | <input type="checkbox"/> | <input type="checkbox"/> | <input type="checkbox"/> | <input type="checkbox"/> |
| <b>Avez-vous pénétré votre partenaire</b>          | <input type="checkbox"/> | <input type="checkbox"/> | <input type="checkbox"/> | <input type="checkbox"/> |

**189. Au cours des 3 derniers mois, lors de ces relations sexuelles avez-vous utilisé :**

|                          | Jamais                   | Rarement                 | Souvent                  | Presque toujours         | Toujours                 |
|--------------------------|--------------------------|--------------------------|--------------------------|--------------------------|--------------------------|
| <b>Le préservatif</b>    | <input type="checkbox"/> |
| <b>Le gel lubrifiant</b> | <input type="checkbox"/> |

**190. Est-il déjà arrivé qu'il/elle vous menace ou exerce une pression psychologique sur vous pour avoir des relations sexuelles ?**

- ☐ C'est arrivé dans les 12 derniers mois
- ☐ C'est arrivé il y a plus de 12 mois
- ☐ Non, jamais

**191. Est-il déjà arrivé que votre partenaire principal.e utilise la force physique pour avoir des relations sexuelles avec vous ou qu'il/elle vous impose des gestes sexuels que vous refusiez ?**

- ☐ C'est arrivé dans les 12 derniers mois
- ☐ C'est arrivé il y a plus de 12 mois
- ☐ Non, jamais

**192. Est-il déjà arrivé que vous menaciez ou exerciez une pression psychologique sur votre partenaire principal.e, pour avoir des relations sexuelles ?**

- ☐ C'est arrivé dans les 12 derniers mois
- ☐ C'est arrivé il y a plus de 12 mois
- ☐ Non, jamais

**193. Est-il déjà arrivé que vous utilisiez la force physique pour avoir des relations sexuelles avec votre partenaire principal.e ou que vous lui imposiez des gestes sexuels qu'il/elle refusait ?**

- ☐ C'est arrivé dans les 12 derniers mois
- ☐ C'est arrivé il y a plus de 12 mois
- ☐ Non, jamais

**Le questionnaire est à présent terminé.**

**Est-ce que vous souhaitez ajouter quelque chose, un événement important de votre vie que nous n'aurions pas noté ? *[Si oui ajouter dans la grille]***

**Nous vous remercions pour le temps que vous nous avez accordé.**

CONFIDENTIEL
