# Supplementary material for: Living conditions, HIV and gender affirmation care pathways of transgender people living with HIV in France: a nationwide, comprehensive, cross-sectional, community-based research protocol (ANRS Trans&HIV)
Source: PubMed Central journal article supplement — BMJ Open. 2021 Dec 16;11(12):e052691. doi: 10.1136/bmjopen-2021-052691 (PMC8679115; doi:10.1136/bmjopen-2021-052691), 2021-12-16
Supplement: bmjopen-2021-052691supp002.pdf [file bmjopen-2021-052691supp002.pdf]

| Années | AGE | Historique résidentiel et administratif |             |                                                                                                                                                             | Emploi et conditions de vie                                                                                                                                            |                                                                                                                                                                                     | Dépistage et histoire avec le VIH               |                                                                                            | Parcours de transition                                   |                                      |          |                                                                                                 | Sante mentale                                    | Expérience carcérale                  | Violences subies                                | Histoire des relations                                  |                                                         | Autres événements marquants                                                              | Années |
|--------|-----|-----------------------------------------|-------------|-------------------------------------------------------------------------------------------------------------------------------------------------------------|------------------------------------------------------------------------------------------------------------------------------------------------------------------------|-------------------------------------------------------------------------------------------------------------------------------------------------------------------------------------|-------------------------------------------------|--------------------------------------------------------------------------------------------|----------------------------------------------------------|--------------------------------------|----------|-------------------------------------------------------------------------------------------------|--------------------------------------------------|---------------------------------------|-------------------------------------------------|---------------------------------------------------------|---------------------------------------------------------|------------------------------------------------------------------------------------------|--------|
|        |     | Pays                                    | Nationalité | Titres de séjour (France )<br>1 : Visa<br>2 : pas de visa<br>3:Pas besoin de visa<br>4: TS<1an<br>5: TS entre 1-3 ans<br>6:TS 10 ans<br>7: Pas besoin de TS | Activités Prof.<br>1.Etudiant<br>2.Emploi déclaré<br>3.Emploi non déclaré<br>4.Sans emploi<br>5.Demandeur d'emploi<br>6.Retraité<br><br>IP Instabilité Professionnelle | Logement<br>1. Propre<br>2. Hébergé par la famille<br>3.Hébergé par autre<br>4. Hébergé par une structure collective<br>5.Squat/rue<br>6.Hotel<br><br>IR: instabilité résidentielle | Dépistages VIH réalisés<br><br>1. T -<br>2. T + | Année du diagnostic et mise sous traitement<br><br>1. D. Diagnostioc<br>2. TTT. traitement | Année où vous êtes identifiées en tant que femme trans ? | Injections<br>1 silicone<br>2. autre | Hormones | Opérations chirurgicales<br>1. Visage<br>2. Seins<br>3. Génital<br>4. Pomme d'adam<br>5. Fesses | 1. Projets de suicide<br>2.Tentatives de Suicide | 1. Garde à vue<br>2. CRA<br>3. Prison | 1. Psychologique<br>2. Physique<br>3. Sexuelles | Relations tarifées<br>1. argent<br>2. services ou autre | Relations amoureuses<br><br>1. P1<br>2. P2<br>3. P3 ... | Mariage;<br>Divorce;<br>naissance d'enfants<br>hospitalisations;<br>décès d'un proche... |        |
| 2021   |     |                                         |             |                                                                                                                                                             |                                                                                                                                                                        |                                                                                                                                                                                     |                                                 |                                                                                            |                                                          |                                      |          |                                                                                                 |                                                  |                                       |                                                 |                                                         |                                                         |                                                                                          | 2021   |
| 2020   |     |                                         |             |                                                                                                                                                             |                                                                                                                                                                        |                                                                                                                                                                                     |                                                 |                                                                                            |                                                          |                                      |          |                                                                                                 |                                                  |                                       |                                                 |                                                         |                                                         |                                                                                          | 2020   |
| 2019   |     |                                         |             |                                                                                                                                                             |                                                                                                                                                                        |                                                                                                                                                                                     |                                                 |                                                                                            |                                                          |                                      |          |                                                                                                 |                                                  |                                       |                                                 |                                                         |                                                         |                                                                                          | 2019   |
| 2018   |     |                                         |             |                                                                                                                                                             |                                                                                                                                                                        |                                                                                                                                                                                     |                                                 |                                                                                            |                                                          |                                      |          |                                                                                                 |                                                  |                                       |                                                 |                                                         |                                                         |                                                                                          | 2018   |
| 2017   |     |                                         |             |                                                                                                                                                             |                                                                                                                                                                        |                                                                                                                                                                                     |                                                 |                                                                                            |                                                          |                                      |          |                                                                                                 |                                                  |                                       |                                                 |                                                         |                                                         |                                                                                          | 2017   |
| 2016   |     |                                         |             |                                                                                                                                                             |                                                                                                                                                                        |                                                                                                                                                                                     |                                                 |                                                                                            |                                                          |                                      |          |                                                                                                 |                                                  |                                       |                                                 |                                                         |                                                         |                                                                                          | 2016   |
| 2015   |     |                                         |             |                                                                                                                                                             |                                                                                                                                                                        |                                                                                                                                                                                     |                                                 |                                                                                            |                                                          |                                      |          |                                                                                                 |                                                  |                                       |                                                 |                                                         |                                                         |                                                                                          | 2015   |
| 2014   |     |                                         |             |                                                                                                                                                             |                                                                                                                                                                        |                                                                                                                                                                                     |                                                 |                                                                                            |                                                          |                                      |          |                                                                                                 |                                                  |                                       |                                                 |                                                         |                                                         |                                                                                          | 2014   |
| 2013   |     |                                         |             |                                                                                                                                                             |                                                                                                                                                                        |                                                                                                                                                                                     |                                                 |                                                                                            |                                                          |                                      |          |                                                                                                 |                                                  |                                       |                                                 |                                                         |                                                         |                                                                                          | 2013   |
| 2012   |     |                                         |             |                                                                                                                                                             |                                                                                                                                                                        |                                                                                                                                                                                     |                                                 |                                                                                            |                                                          |                                      |          |                                                                                                 |                                                  |                                       |                                                 |                                                         |                                                         |                                                                                          | 2012   |
| 2011   |     |                                         |             |                                                                                                                                                             |                                                                                                                                                                        |                                                                                                                                                                                     |                                                 |                                                                                            |                                                          |                                      |          |                                                                                                 |                                                  |                                       |                                                 |                                                         |                                                         |                                                                                          | 2011   |
| 2010   |     |                                         |             |                                                                                                                                                             |                                                                                                                                                                        |                                                                                                                                                                                     |                                                 |                                                                                            |                                                          |                                      |          |                                                                                                 |                                                  |                                       |                                                 |                                                         |                                                         |                                                                                          | 2010   |
| 2009   |     |                                         |             |                                                                                                                                                             |                                                                                                                                                                        |                                                                                                                                                                                     |                                                 |                                                                                            |                                                          |                                      |          |                                                                                                 |                                                  |                                       |                                                 |                                                         |                                                         |                                                                                          | 2009   |
| 2008   |     |                                         |             |                                                                                                                                                             |                                                                                                                                                                        |                                                                                                                                                                                     |                                                 |                                                                                            |                                                          |                                      |          |                                                                                                 |                                                  |                                       |                                                 |                                                         |                                                         |                                                                                          | 2008   |
| 2007   |     |                                         |             |                                                                                                                                                             |                                                                                                                                                                        |                                                                                                                                                                                     |                                                 |                                                                                            |                                                          |                                      |          |                                                                                                 |                                                  |                                       |                                                 |                                                         |                                                         |                                                                                          | 2007   |
| 2006   |     |                                         |             |                                                                                                                                                             |                                                                                                                                                                        |                                                                                                                                                                                     |                                                 |                                                                                            |                                                          |                                      |          |                                                                                                 |                                                  |                                       |                                                 |                                                         |                                                         |                                                                                          | 2006   |
| 2005   |     |                                         |             |                                                                                                                                                             |                                                                                                                                                                        |                                                                                                                                                                                     |                                                 |                                                                                            |                                                          |                                      |          |                                                                                                 |                                                  |                                       |                                                 |                                                         |                                                         |                                                                                          | 2005   |
| 2004   |     |                                         |             |                                                                                                                                                             |                                                                                                                                                                        |                                                                                                                                                                                     |                                                 |                                                                                            |                                                          |                                      |          |                                                                                                 |                                                  |                                       |                                                 |                                                         |                                                         |                                                                                          | 2004   |
| 2003   |     |                                         |             |                                                                                                                                                             |                                                                                                                                                                        |                                                                                                                                                                                     |                                                 |                                                                                            |                                                          |                                      |          |                                                                                                 |                                                  |                                       |                                                 |                                                         |                                                         |                                                                                          | 2003   |
| 2002   |     |                                         |             |                                                                                                                                                             |                                                                                                                                                                        |                                                                                                                                                                                     |                                                 |                                                                                            |                                                          |                                      |          |                                                                                                 |                                                  |                                       |                                                 |                                                         |                                                         |                                                                                          | 2002   |
| 2001   |     |                                         |             |                                                                                                                                                             |                                                                                                                                                                        |                                                                                                                                                                                     |                                                 |                                                                                            |                                                          |                                      |          |                                                                                                 |                                                  |                                       |                                                 |                                                         |                                                         |                                                                                          | 2001   |
| 2000   |     |                                         |             |                                                                                                                                                             |                                                                                                                                                                        |                                                                                                                                                                                     |                                                 |                                                                                            |                                                          |                                      |          |                                                                                                 |                                                  |                                       |                                                 |                                                         |                                                         |                                                                                          | 2000   |
| 1999   |     |                                         |             |                                                                                                                                                             |                                                                                                                                                                        |                                                                                                                                                                                     |                                                 |                                                                                            |                                                          |                                      |          |                                                                                                 |                                                  |                                       |                                                 |                                                         |                                                         |                                                                                          | 1999   |
| 1998   |     |                                         |             |                                                                                                                                                             |                                                                                                                                                                        |                                                                                                                                                                                     |                                                 |                                                                                            |                                                          |                                      |          |                                                                                                 |                                                  |                                       |                                                 |                                                         |                                                         |                                                                                          | 1998   |
| 1997   |     |                                         |             |                                                                                                                                                             |                                                                                                                                                                        |                                                                                                                                                                                     |                                                 |                                                                                            |                                                          |                                      |          |                                                                                                 |                                                  |                                       |                                                 |                                                         |                                                         |                                                                                          | 1997   |
| 1996   |     |                                         |             |                                                                                                                                                             |                                                                                                                                                                        |                                                                                                                                                                                     |                                                 |                                                                                            |                                                          |                                      |          |                                                                                                 |                                                  |                                       |                                                 |                                                         |                                                         |                                                                                          | 1996   |
| 1995   |     |                                         |             |                                                                                                                                                             |                                                                                                                                                                        |                                                                                                                                                                                     |                                                 |                                                                                            |                                                          |                                      |          |                                                                                                 |                                                  |                                       |                                                 |                                                         |                                                         |                                                                                          | 1995   |
| 1994   |     |                                         |             |                                                                                                                                                             |                                                                                                                                                                        |                                                                                                                                                                                     |                                                 |                                                                                            |                                                          |                                      |          |                                                                                                 |                                                  |                                       |                                                 |                                                         |                                                         |                                                                                          | 1994   |
| 1993   |     |                                         |             |                                                                                                                                                             |                                                                                                                                                                        |                                                                                                                                                                                     |                                                 |                                                                                            |                                                          |                                      |          |                                                                                                 |                                                  |                                       |                                                 |                                                         |                                                         |                                                                                          | 1993   |
| 1992   |     |                                         |             |                                                                                                                                                             |                                                                                                                                                                        |                                                                                                                                                                                     |                                                 |                                                                                            |                                                          |                                      |          |                                                                                                 |                                                  |                                       |                                                 |                                                         |                                                         |                                                                                          | 1992   |
| 1991   |     |                                         |             |                                                                                                                                                             |                                                                                                                                                                        |                                                                                                                                                                                     |                                                 |                                                                                            |                                                          |                                      |          |                                                                                                 |                                                  |                                       |                                                 |                                                         |                                                         |                                                                                          | 1991   |
| 1990   |     |                                         |             |                                                                                                                                                             |                                                                                                                                                                        |                                                                                                                                                                                     |                                                 |                                                                                            |                                                          |                                      |          |                                                                                                 |                                                  |                                       |                                                 |                                                         |                                                         |                                                                                          | 1990   |
| 1989   |     |                                         |             |                                                                                                                                                             |                                                                                                                                                                        |                                                                                                                                                                                     |                                                 |                                                                                            |                                                          |                                      |          |                                                                                                 |                                                  |                                       |                                                 |                                                         |                                                         |                                                                                          | 1989   |
| 1988   |     |                                         |             |                                                                                                                                                             |                                                                                                                                                                        |                                                                                                                                                                                     |                                                 |                                                                                            |                                                          |                                      |          |                                                                                                 |                                                  |                                       |                                                 |                                                         |                                                         |                                                                                          | 1988   |
| 1987   |     |                                         |             |                                                                                                                                                             |                                                                                                                                                                        |                                                                                                                                                                                     |                                                 |                                                                                            |                                                          |                                      |          |                                                                                                 |                                                  |                                       |                                                 |                                                         |                                                         |                                                                                          | 1987   |
| 1986   |     |                                         |             |                                                                                                                                                             |                                                                                                                                                                        |                                                                                                                                                                                     |                                                 |                                                                                            |                                                          |                                      |          |                                                                                                 |                                                  |                                       |                                                 |                                                         |                                                         |                                                                                          | 1986   |
| 1985   |     |                                         |             |                                                                                                                                                             |                                                                                                                                                                        |                                                                                                                                                                                     |                                                 |                                                                                            |                                                          |                                      |          |                                                                                                 |                                                  |                                       |                                                 |                                                         |                                                         |                                                                                          | 1985   |
| 1984   |     |                                         |             |                                                                                                                                                             |                                                                                                                                                                        |                                                                                                                                                                                     |                                                 |                                                                                            |                                                          |                                      |          |                                                                                                 |                                                  |                                       |                                                 |                                                         |                                                         |                                                                                          | 1984   |
| 1983   |     |                                         |             |                                                                                                                                                             |                                                                                                                                                                        |                                                                                                                                                                                     |                                                 |                                                                                            |                                                          |                                      |          |                                                                                                 |                                                  |                                       |                                                 |                                                         |                                                         |                                                                                          | 1983   |
| 1982   |     |                                         |             |                                                                                                                                                             |                                                                                                                                                                        |                                                                                                                                                                                     |                                                 |                                                                                            |                                                          |                                      |          |                                                                                                 |                                                  |                                       |                                                 |                                                         |                                                         |                                                                                          | 1982   |
| 1981   |     |                                         |             |                                                                                                                                                             |                                                                                                                                                                        |                                                                                                                                                                                     |                                                 |                                                                                            |                                                          |                                      |          |                                                                                                 |                                                  |                                       |                                                 |                                                         |                                                         |                                                                                          | 1981   |
| 1980   |     |                                         |             |                                                                                                                                                             |                                                                                                                                                                        |                                                                                                                                                                                     |                                                 |                                                                                            |                                                          |                                      |          |                                                                                                 |                                                  |                                       |                                                 |                                                         |                                                         |                                                                                          | 1980   |
| 1979   |     |                                         |             |                                                                                                                                                             |                                                                                                                                                                        |                                                                                                                                                                                     |                                                 |                                                                                            |                                                          |                                      |          |                                                                                                 |                                                  |                                       |                                                 |                                                         |                                                         |                                                                                          | 1979   |
| 1978   |     |                                         |             |                                                                                                                                                             |                                                                                                                                                                        |                                                                                                                                                                                     |                                                 |                                                                                            |                                                          |                                      |          |                                                                                                 |                                                  |                                       |                                                 |                                                         |                                                         |                                                                                          | 1978   |
| 1977   |     |                                         |             |                                                                                                                                                             |                                                                                                                                                                        |                                                                                                                                                                                     |                                                 |                                                                                            |                                                          |                                      |          |                                                                                                 |                                                  |                                       |                                                 |                                                         |                                                         |                                                                                          | 1977   |
| 1976   |     |                                         |             |                                                                                                                                                             |                                                                                                                                                                        |                                                                                                                                                                                     |                                                 |                                                                                            |                                                          |                                      |          |                                                                                                 |                                                  |                                       |                                                 |                                                         |                                                         |                                                                                          | 1976   |
| 1975   |     |                                         |             |                                                                                                                                                             |                                                                                                                                                                        |                                                                                                                                                                                     |                                                 |                                                                                            |                                                          |                                      |          |                                                                                                 |                                                  |                                       |                                                 |                                                         |                                                         |                                                                                          | 1975   |
| 1974   |     |                                         |             |                                                                                                                                                             |                                                                                                                                                                        |                                                                                                                                                                                     |                                                 |                                                                                            |                                                          |                                      |          |                                                                                                 |                                                  |                                       |                                                 |                                                         |                                                         |                                                                                          | 1974   |
| 1973   |     |                                         |             |                                                                                                                                                             |                                                                                                                                                                        |                                                                                                                                                                                     |                                                 |                                                                                            |                                                          |                                      |          |                                                                                                 |                                                  |                                       |                                                 |                                                         |                                                         |                                                                                          | 1973   |
| 1972   |     |                                         |             |                                                                                                                                                             |                                                                                                                                                                        |                                                                                                                                                                                     |                                                 |                                                                                            |                                                          |                                      |          |                                                                                                 |                                                  |                                       |                                                 |                                                         |                                                         |                                                                                          | 1972   |
| 1971   |     |                                         |             |                                                                                                                                                             |                                                                                                                                                                        |                                                                                                                                                                                     |                                                 |                                                                                            |                                                          |                                      |          |                                                                                                 |                                                  |                                       |                                                 |                                                         |                                                         |                                                                                          | 1971   |
| 1970   |     |                                         |             |                                                                                                                                                             |                                                                                                                                                                        |                                                                                                                                                                                     |                                                 |                                                                                            |                                                          |                                      |          |                                                                                                 |                                                  |                                       |                                                 |                                                         |                                                         |                                                                                          | 1970   |
| 1969   |     |                                         |             |                                                                                                                                                             |                                                                                                                                                                        |                                                                                                                                                                                     |                                                 |                                                                                            |                                                          |                                      |          |                                                                                                 |                                                  |                                       |                                                 |                                                         |                                                         |                                                                                          | 1969   |
| 1968   |     |                                         |             |                                                                                                                                                             |                                                                                                                                                                        |                                                                                                                                                                                     |                                                 |                                                                                            |                                                          |                                      |          |                                                                                                 |                                                  |                                       |                                                 |                                                         |                                                         |                                                                                          | 1968   |
| 1967   |     |                                         |             |                                                                                                                                                             |                                                                                                                                                                        |                                                                                                                                                                                     |                                                 |                                                                                            |                                                          |                                      |          |                                                                                                 |                                                  |                                       |                                                 |                                                         |                                                         |                                                                                          | 1967   |
| 1966   |     |                                         |             |                                                                                                                                                             |                                                                                                                                                                        |                                                                                                                                                                                     |                                                 |                                                                                            |                                                          |                                      |          |                                                                                                 |                                                  |                                       |                                                 |                                                         |                                                         |                                                                                          | 1966   |
| 1965   |     |                                         |             |                                                                                                                                                             |                                                                                                                                                                        |                                                                                                                                                                                     |                                                 |                                                                                            |                                                          |                                      |          |                                                                                                 |                                                  |                                       |                                                 |                                                         |                                                         |                                                                                          | 1965   |
| 1964   |     |                                         |             |                                                                                                                                                             |                                                                                                                                                                        |                                                                                                                                                                                     |                                                 |                                                                                            |                                                          |                                      |          |                                                                                                 |                                                  |                                       |                                                 |                                                         |                                                         |                                                                                          | 1964   |

|      |  |  |  |  |  |  |  |  |  |  |  |  |  |  |  |  |  |  |      |
|------|--|--|--|--|--|--|--|--|--|--|--|--|--|--|--|--|--|--|------|
| 1963 |  |  |  |  |  |  |  |  |  |  |  |  |  |  |  |  |  |  | 1963 |
| 1962 |  |  |  |  |  |  |  |  |  |  |  |  |  |  |  |  |  |  | 1962 |
| 1961 |  |  |  |  |  |  |  |  |  |  |  |  |  |  |  |  |  |  | 1961 |
| 1960 |  |  |  |  |  |  |  |  |  |  |  |  |  |  |  |  |  |  | 1960 |
| 1959 |  |  |  |  |  |  |  |  |  |  |  |  |  |  |  |  |  |  | 1959 |
| 1958 |  |  |  |  |  |  |  |  |  |  |  |  |  |  |  |  |  |  | 1958 |
| 1957 |  |  |  |  |  |  |  |  |  |  |  |  |  |  |  |  |  |  | 1957 |
| 1956 |  |  |  |  |  |  |  |  |  |  |  |  |  |  |  |  |  |  | 1956 |
| 1955 |  |  |  |  |  |  |  |  |  |  |  |  |  |  |  |  |  |  | 1955 |
| 1954 |  |  |  |  |  |  |  |  |  |  |  |  |  |  |  |  |  |  | 1954 |
| 1953 |  |  |  |  |  |  |  |  |  |  |  |  |  |  |  |  |  |  | 1953 |
| 1952 |  |  |  |  |  |  |  |  |  |  |  |  |  |  |  |  |  |  | 1952 |
| 1951 |  |  |  |  |  |  |  |  |  |  |  |  |  |  |  |  |  |  | 1951 |
| 1950 |  |  |  |  |  |  |  |  |  |  |  |  |  |  |  |  |  |  | 1950 |
