# Supplementary material for: Living conditions, HIV and gender affirmation care pathways of transgender people living with HIV in France: a nationwide, comprehensive, cross-sectional, community-based research protocol (ANRS Trans&HIV)
Source: PubMed Central journal article supplement — BMJ Open. 2021 Dec 16;11(12):e052691. doi: 10.1136/bmjopen-2021-052691 (PMC8679115; doi:10.1136/bmjopen-2021-052691), 2021-12-16
Supplement: bmjopen-2021-052691supp003.pdf [file bmjopen-2021-052691supp003.pdf]

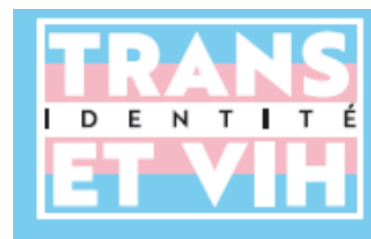

Date : / / /

# Fiche médicale

N° Identifiant Trans&VIH : | | | | | | |

1. Année de naissance : / / /

2. Poids : / / / kg

3. Taille : / / / cm

## TRANSITION

### 1. Sexe de naissance :

☐<sub>1</sub> Homme

☐<sub>2</sub> Femme

### 2. Genre enregistré dans le dossier médical :

☐<sub>1</sub> Masculin

☐<sub>2</sub> Féminin

 Non renseigné ☐<sub>99</sub>

### 3. L'état civil dans le dossier administratif est-il en adéquation avec le genre vécu :

☐<sub>1</sub> Oui

☐<sub>2</sub> Non

☐<sub>3</sub> Non concerné

### 4. Chirurgie de féminisation

☐ ..... → Mois : /\_\_\_/\_\_\_/ Année : /\_\_\_/\_\_\_/\_\_\_/\_\_\_/

☐ ..... → Mois : /\_\_\_/\_\_\_/ Année : /\_\_\_/\_\_\_/\_\_\_/\_\_\_/

☐ ..... → Mois : /\_\_\_/\_\_\_/ Année : /\_\_\_/\_\_\_/\_\_\_/\_\_\_/

☐ ..... → Mois : /\_\_\_/\_\_\_/ Année : /\_\_\_/\_\_\_/\_\_\_/\_\_\_/

### 5. Chirurgie de masculinisation

☐ ..... → Mois : /\_\_\_/\_\_\_/ Année : /\_\_\_/\_\_\_/\_\_\_/\_\_\_/

☐ ..... → Mois : /\_\_\_/\_\_\_/ Année : /\_\_\_/\_\_\_/\_\_\_/\_\_\_/

☐ ..... → Mois : /\_\_\_/\_\_\_/ Année : /\_\_\_/\_\_\_/\_\_\_/\_\_\_/

☐ ..... → Mois : /\_\_\_/\_\_\_/ Année : /\_\_\_/\_\_\_/\_\_\_/\_\_\_/

### 6. Chirurgie de réassignation sexuelle

☐<sub>1</sub> Oui, préciser lesquelles :

☐ ..... → Mois : /\_\_\_/\_\_\_/ Année : /\_\_\_/\_\_\_/\_\_\_/\_\_\_/

☐ ..... → Mois : /\_\_\_/\_\_\_/ Année : /\_\_\_/\_\_\_/\_\_\_/\_\_\_/

☐ ..... → Mois : /\_\_\_/\_\_\_/ Année : /\_\_\_/\_\_\_/\_\_\_/\_\_\_/

### 7. Complications post chirurgicale de réassignation

☐<sub>1</sub> Oui

☐<sub>2</sub> Non

 Non renseigné ☐<sub>99</sub>

☐ Si oui, préciser : .....

.....

.....

### 8. Pathologies secondaires liées aux interventions de féminisation/ masculinisation

☐<sub>1</sub> Oui → Mois : /\_\_\_/\_\_\_/ Année : /\_\_\_/\_\_\_/\_\_\_/\_\_\_/

☐<sub>2</sub> Non

 Non renseigné ☐<sub>99</sub>

☐ Si oui, préciser : .....

.....

.....

### 9. Injection de silicone, huiles...

☐<sub>1</sub> Oui → Mois : /\_\_\_/\_\_\_/ Année : /\_\_\_/\_\_\_/\_\_\_/\_\_\_/

☐<sub>2</sub> Non

 Non renseigné ☐<sub>99</sub>

### 10. Pathologies/problèmes ? en lien avec les injections de silicone, huiles...

☐<sub>1</sub> Oui

☐<sub>2</sub> Non

 Non renseigné ☐<sub>99</sub>

☐ Si oui, préciser : .....

.....

## CARACTERISTIQUES DE LA MALADIE VIH

### 11. Date de diagnostic VIH

Mois : /\_\_\_/\_\_\_/

Année : /\_\_\_/\_\_\_/\_\_\_/

### 12. Mode de contamination

- ☐<sub>1</sub> - Rapports homo/bisexuels  
☐<sub>2</sub> - Usage de drogues injectables  
☐<sub>3</sub> - 1+2  
☐<sub>4</sub> - Rapports hétérosexuels  
☐<sub>5</sub> - Transfusion ou injection de produits anti-hémophiliques  
☐<sub>6</sub> - Autre (dont AES)  
☐<sub>7</sub> - Indéterminé après enquête ou mode de transmission inconnu

### 13. CD4 lors du premier bilan connu

Mois : /\_\_\_/\_\_\_/

Année : /\_\_\_/\_\_\_/\_\_\_/

CD4 (en nombre absolu / mm<sup>3</sup>) : .....Non renseigné ☐<sub>99</sub>

### 14. Année du 1er traitement antirétroviral (y compris AZT monothérapie) /\_\_\_/\_\_\_/\_\_\_/

☐<sub>1</sub> Patient.e jamais traité.e

### 15. Antécédents d'infection opportuniste et/ou de pathologie classante Sida

☐<sub>1</sub> Oui TB

↳ Si oui, année du premier événement classant Sida : /\_\_\_/\_\_\_/\_\_\_/

☐<sub>2</sub> Oui autre

↳ Si oui, année du premier événement classant Sida : /\_\_\_/\_\_\_/\_\_\_/

☐<sub>2</sub> Non

### 16. CD4 lors de la mise sous HAART

Mois : /\_\_\_/\_\_\_/

Année : /\_\_\_/\_\_\_/\_\_\_/

CD4 (en nombre absolu / mm<sup>3</sup>) : .....Non renseigné ☐<sub>99</sub>

### 17. Charge virale VIH lors du dernier bilan connu

Mois : /\_\_\_/\_\_\_/

Année : /\_\_\_/\_\_\_/\_\_\_/

☐<sub>1</sub> Indéetectable → Seuil de détection : < à .....☐<sub>2</sub> Détectable → Valeur (en copies/ml) : .....Non renseigné ☐<sub>99</sub>

### 18. CD4 lors du dernier bilan connu

Mois : /\_\_\_/\_\_\_/

Année : /\_\_\_/\_\_\_/\_\_\_/

CD4 (en nombre absolu / mm<sup>3</sup>) : .....Non renseigné ☐<sub>99</sub>

### 19. Date de la dernière charge virale détectable

Mois : /\_\_\_/\_\_\_/

Année : /\_\_\_/\_\_\_/\_\_\_/

Seuil de détection de la technique utilisée : .....

Non renseigné ☐<sub>99</sub>

## COMORBIDITES ACTUELLES OU PASSES

### 20. Diabète (traité ou non)

(Défini par une glycémie à jeun  $\geq 1,26$ g/l (7 mmol/l) ou une glycémie  $> 2$ g/l (11,1 mmol/l) à n'importe quel moment de la journée ou à 2h d'une HGPO)

☐ 1 Oui → Année de diagnostic : /\_\_\_/\_\_\_/\_\_\_/\_\_\_/

☐ 2 Non

Non renseigné ☐ 99

### 21. Syndrome dyslipidémie

☐ 1 Oui → Année de diagnostic : /\_\_\_/\_\_\_/\_\_\_/\_\_\_/

☐ 2 Non

Non renseigné ☐ 99

### 22. Ostéoporose (traitée ou non)

☐ 1 Oui → Année de diagnostic : /\_\_\_/\_\_\_/\_\_\_/\_\_\_/

☐ 2 Non

Non renseigné ☐ 99

### 23. Hypertension artérielle (traitée ou non)

☐ 1 Oui → Année de diagnostic : /\_\_\_/\_\_\_/\_\_\_/\_\_\_/

☐ 2 Non

Non renseigné ☐ 99

### 24. Pathologie cardiovasculaire

(incluant : infarctus du myocarde, angor stable ou instable, artérite des membres inférieurs, thrombophlébite, accident ischémique transitoire, accident vasculaire cérébral, intervention chirurgicale artérielle)

☐ 1 Oui → Année de survenue du 1<sup>er</sup> événement cardiovasculaire : /\_\_\_/\_\_\_/\_\_\_/\_\_\_/

☐ 2 Non

☐ 99 Non renseigné

### 25. Cancer (classant Sida ou non)

☐ 1 Oui → Année de diagnostic : /\_\_\_/\_\_\_/\_\_\_/\_\_\_/

☐ 2 Non

Non renseigné ☐ 99

### 26. Hépatite B

☐ 1 Oui

☐ 2 Non

↳ Année de diagnostic : /\_\_\_/\_\_\_/\_\_\_/\_\_\_/

Non renseigné ☐ 99

↳ S'agit-il d'une hépatite B chronique ? ☐ 1 Oui

☐ 2 Non

Non renseigné ☐ 99

### 27. Immunisation VHB

☐ 3 Ac anti HBs Ac Anti HBc

☐ 4 Ac Anti HBc

Non renseigné ☐ 99

### 28. Hépatite C

☐ 1 Guérie spontanément

☐ 2 traitée Guérie

☐ 3 Traitement en cours

☐ 4 En échec

☐ 5 Pas de traitement

Non renseigné ☐ 99

### 29. Antécédents Syphilis (traitée ou non)

☐ 1 Oui

☐ 2 Non

Non renseigné ☐ 99

### 30. Antécédents Chlamydia (traité ou non)

☐ 1 Oui

☐ 2 Non

Non renseigné ☐ 99

31. Antécédents blennorragie gonococcique (traitée ou non)

☐ 1 Oui      ☐ 2 Non      Non renseigné ☐ 99

32. Antécédents HPV

☐ 1 Oui      ☐ 2 Non      Non renseigné ☐ 99

33. Problèmes de santé mentale

☐ 1 Oui      ☐ 2 Non      Non renseigné ☐ 99

Si oui ➤ Etat anxio-dépressif      ☐ 1 Oui    ☐ 2 Non  
➤ Dépression      ☐ 1 Oui    ☐ 2 Non  
➤ Psychose      ☐ 1 Oui    ☐ 2 Non  
➤ Autres, préciser : .....

34. Problèmes actuels d'addiction

- ☐ 1 Tabac,
- ☐ 2 Alcool
- ☐ 3 Cannabis
- ☐ 4 Médicaments
- ☐ 5 Autre \_\_\_\_\_

35. Autres antécédents d'intérêt particulier

☐ 1 Oui      ☐ 2 Non  
➤ Si oui, préciser : .....  
.....  
.....

TRAITEMENTS

36. Traitement antirétroviral pour le VIH à la dernière prescription (y compris ce jour)

- ☐ 1 Patient.e non traité.e
- ☐ 2 Patient.e naïf.ve de tout traitement
- ☐ 3 Patient.e pré-traité.e en rupture de traitement
- ☐ 4 Patient.e traité.e actuellement

37. Liste des médicaments actuellement prescrits

| Antirétroviraux | Nom | Nb de comprimé(s) par prise | Nb de prises par jour |
|-----------------|-----|-----------------------------|-----------------------|
|                 |     |                             |                       |
|                 |     |                             |                       |
|                 |     |                             |                       |
|                 |     |                             |                       |
|                 |     |                             |                       |
|                 |     |                             |                       |

| Hormonothérapie    | Nom |
|--------------------|-----|
|                    |     |
|                    |     |
|                    |     |
|                    |     |
|                    |     |
| Hypoglycémiants    | Nom |
|                    |     |
|                    |     |
|                    |     |
|                    |     |
| Hypolipémiants     | Nom |
|                    |     |
|                    |     |
|                    |     |
|                    |     |
|                    |     |
| Antihypertenseurs  | Nom |
|                    |     |
|                    |     |
|                    |     |
|                    |     |
| Psychotropes       | Nom |
|                    |     |
|                    |     |
|                    |     |
|                    |     |
| Autres traitements | Nom |
|                    |     |
|                    |     |
|                    |     |
|                    |     |
|                    |     |
