# Supplementary material for: Living conditions, HIV and gender affirmation care pathways of transgender people living with HIV in France: a nationwide, comprehensive, cross-sectional, community-based research protocol (ANRS Trans&HIV)
Source: PubMed Central journal article supplement — BMJ Open. 2021 Dec 16;11(12):e052691. doi: 10.1136/bmjopen-2021-052691 (PMC8679115; doi:10.1136/bmjopen-2021-052691), 2021-12-16
Supplement: bmjopen-2021-052691supp004.pdf [file bmjopen-2021-052691supp004.pdf]

## Guide d'entretien TRANS&VIH

### 1.- Introduction :

Dans le cadre du projet Trans&VIH, le volet qualitatif a pour objectif de « recueillir des informations fines auprès des quelques hommes trans séropositifs identifiés dans ces mêmes services (hospitaliers), à travers des entretiens individuels... La grille d'entretien permettra de structurer l'interview et d'aborder les questions autour des conditions de vie, parcours de migration, de transition, d'acquisition du VIH et du suivi médical. »<sup>1</sup>

### 2.- Questions :

**Question d'ouverture : Entamer une transition identitaire constitue un moment important de votre vie. Pourriez-vous me parler de votre expérience personnelle ?**

| SUJETS                                   | QUESTIONS OUVERTES                                                                                                                                                                                                                                                                                                                                                                                                                                                                                  |
|------------------------------------------|-----------------------------------------------------------------------------------------------------------------------------------------------------------------------------------------------------------------------------------------------------------------------------------------------------------------------------------------------------------------------------------------------------------------------------------------------------------------------------------------------------|
| <b>Parcours de transitions</b>           | <p>Par quels moyens êtes-vous parvenu à affirmer et visibiliser votre identité de genre ?</p> <ul style="list-style-type: none"> <li>- Prise de testostérone ?</li> <li>- Opération chirurgicale ?</li> <li>- Quelles difficultés avez-vous rencontré ?</li> </ul> <p>Etes-vous satisfait de la qualité de la prise en charge médicale lors de votre parcours de transition.</p> <ul style="list-style-type: none"> <li>- Quelles difficultés rencontrées ?</li> <li>- Discriminations ?</li> </ul> |
| <b>Identité de genre</b>                 | <p>Viviez-vous au quotidien en harmonie avec votre genre souhaité ?</p> <ul style="list-style-type: none"> <li>- Avez-vous modifié vos documents d'identité ?</li> <li>- Si oui, comment jugeriez-vous la procédure de rectification des documents d'identité ? Est-elle respectée ?</li> <li>- Avez-vous rencontré des difficultés ?</li> </ul>                                                                                                                                                    |
| <b>Dépistage et Histoire avec le VIH</b> | <p>A quel moment avez-vous appris votre séropositivité au VIH ?</p> <ul style="list-style-type: none"> <li>- A quel(s) moment(s) de votre vie avez-vous l'impression d'avoir couru le plus des risques de transmission du VIH ?</li> <li>- Comment gérez-vous ces situations aujourd'hui ?</li> <li>- Au niveau physique et psychologique, pourriez-vous me parler des interactions que vous avez pu observer sur votre</li> </ul>                                                                  |

<sup>1</sup> Protocole ANRS TRANS&VIH, p.15

|                                                                |                                                                                                                                                                                                                                                                                                                                                                                                                                                               |
|----------------------------------------------------------------|---------------------------------------------------------------------------------------------------------------------------------------------------------------------------------------------------------------------------------------------------------------------------------------------------------------------------------------------------------------------------------------------------------------------------------------------------------------|
|                                                                | <p>métabolisme entre le traitement contre le VIH et la testostérone ?<br/>Cela vous a-t-il mené à interrompre l'un des deux voire les deux ?</p> <ul style="list-style-type: none"> <li>- Aujourd'hui, pouvez-vous dire que vous êtes satisfait de votre suivi médical ?</li> </ul>                                                                                                                                                                           |
| <b>Orientation et vie sexuelle</b>                             | <p>Etes-vous satisfait de votre vie sexuelle ?</p> <ul style="list-style-type: none"> <li>- Comment décririez-vous votre vie sexuelle ?</li> <li>- Impact des effets secondaires de la testostérone sur la vie sexuelle</li> <li>- Y-a-t-il des événements marquants dans votre vie sexuelle qu'ils soient positifs ou négatifs dont vous aimeriez évoquer ?</li> <li>- Avez-vous déjà eu des rapports sexuels en échanges d'argent ou de services</li> </ul> |
| <b>Conditions de vie actuelle</b>                              | <p>Que pouvez-vous dire quant à vos conditions de vie actuelle (emploi, logement etc?)</p> <ul style="list-style-type: none"> <li>- Avez-vous déjà rencontré des situations de précarité.</li> <li>- Comment vous faites lorsque vous êtes confronté à une situation de précarité ?</li> <li>- Avez-vous déjà vécu des situations de discrimination ?</li> </ul>                                                                                              |
| <b>Estime de soi et santé mentale</b>                          | <p>Comment vous-vous sentez dans la vie de tous les jours ?</p> <ul style="list-style-type: none"> <li>- Avez-vous déjà vécu des situations difficiles ?</li> <li>- Comment les avez-vous surmontées ?</li> <li>- Avez-vous eu des idées suicidaires au cours de votre vie ?</li> </ul>                                                                                                                                                                       |
| <b>Consommation de drogues</b>                                 | <p>Avez-vous déjà consommé des produits psychoactifs ?</p>                                                                                                                                                                                                                                                                                                                                                                                                    |
| <b>Relations sociales, discriminations, et vie associative</b> | <p>Peut-on établir qu'être trans et séropositif fait l'objet davantage des discriminations ?</p> <ul style="list-style-type: none"> <li>- Quel type de discrimination avez-vous déjà vécu</li> <li>- Votre entourage vous soutient-il ?</li> <li>- Avez-vous déjà subi des violences ?</li> </ul>                                                                                                                                                             |
| <b>Projets parentaux</b>                                       | <p>Parmi vos projets pour l'avenir, avez-vous considéré la possibilité de devenir père ? En avez-vous parlé à votre médecin et éventuellement à votre couple ? Etant donné qu'une personne indétectable ne transmet pas le virus du VIH à l'enfant, trouvez-vous du soutien dans votre entourage y compris vos médecins pour vous encourager dans votre projet de transpaternité ?</p>                                                                        |
