# Supplementary material for: Living conditions, HIV and gender affirmation care pathways of transgender people living with HIV in France: a nationwide, comprehensive, cross-sectional, community-based research protocol (ANRS Trans&HIV)
Source: PubMed Central journal article supplement — BMJ Open. 2021 Dec 16;11(12):e052691. doi: 10.1136/bmjopen-2021-052691 (PMC8679115; doi:10.1136/bmjopen-2021-052691), 2021-12-16
Supplement: bmjopen-2021-052691supp005.pdf [file bmjopen-2021-052691supp005.pdf]

# FICHE CENTRE

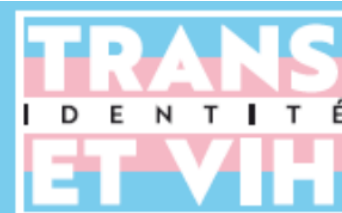

1. **Date :**     /\_\_/\_/ /\_\_/\_/     /\_\_/\_/\_\_\_/
2. **Nom du centre :** \_\_\_\_\_
3. **Ville ou arrondissement :** \_\_\_\_\_
4. **Spécialité du service :** \_\_\_\_\_
5. **Nom du chef de service :** \_\_\_\_\_
6. **Effectifs du service en 2019**

|                                                                             | Nombre de<br>personnel<br>permanent | Nombre de<br>personnel<br>vacataire | ETP<br>total |
|-----------------------------------------------------------------------------|-------------------------------------|-------------------------------------|--------------|
| a. Médecins spécialistes                                                    | __ _                                | __ _                                | __ _         |
| b. Médecins généralistes                                                    | __ _                                | __ _                                | __ _         |
| c. Infirmiers                                                               | __ _                                | __ _                                | __ _         |
| d. Autres personnels soignants                                              | __ _                                | __ _                                | __ _         |
| e. Techniciens d'études clinique                                            | __ _                                | __ _                                | __ _         |
| f. Moniteurs d'études clinique                                              | __ _                                | __ _                                | __ _         |
| g. Assistant social                                                         | __ _                                | __ _                                | __ _         |
| h. Psychologue                                                              | __ _                                | __ _                                | __ _         |
| i. Pharmacien                                                               | __ _                                | __ _                                | __ _         |
| j. Médiateur de santé de l'hôpital                                          | __ _                                | __ _                                | __ _         |
| k. Intervenant communautaire ou médiateur<br>extérieur (salariés/bénévoles) | __ _                                | __ _                                | __ _         |
| l. Autres                                                                   | __ _                                | __ _                                | __ _         |
| m. Personnel total                                                          | __ _                                | __ _                                | __ _         |

**7. Jours et horaires des consultations :**

Lundi De \_\_\_\_ h \_\_\_\_ à \_\_\_\_ h \_\_\_\_ et de \_\_\_\_ h \_\_\_\_ à \_\_\_\_ h \_\_\_\_

Mardi De \_\_\_\_ h \_\_\_\_ à \_\_\_\_ h \_\_\_\_ et de \_\_\_\_ h \_\_\_\_ à \_\_\_\_ h \_\_\_\_

Mercredi De \_\_\_\_ h \_\_\_\_ à \_\_\_\_ h \_\_\_\_ et de \_\_\_\_ h \_\_\_\_ à \_\_\_\_ h \_\_\_\_

Jeudi De \_\_\_\_ h \_\_\_\_ à \_\_\_\_ h \_\_\_\_ et de \_\_\_\_ h \_\_\_\_ à \_\_\_\_ h \_\_\_\_

Vendredi De \_\_\_\_ h \_\_\_\_ à \_\_\_\_ h \_\_\_\_ et de \_\_\_\_ h \_\_\_\_ à \_\_\_\_ h \_\_\_\_

Samedi De \_\_\_\_ h \_\_\_\_ à \_\_\_\_ h \_\_\_\_ et de \_\_\_\_ h \_\_\_\_ à \_\_\_\_ h \_\_\_\_

**8. Le service est-il impliqué dans d'autres projets de recherche ?**

- clinique : oui ☐ non ☐

- Autre : oui ☐ non ☐

→ Si oui préciser : \_\_\_\_\_

**9. Les consultations suivantes sont-elles présentes dans le centre ?**

|                             | OUI DANS LE SERVICE      | OUI DANS LE CENTRE       | ADRESSE AUX PARTENAIRES  |
|-----------------------------|--------------------------|--------------------------|--------------------------|
| INFECTIOLOGIE               | <input type="checkbox"/> | <input type="checkbox"/> | <input type="checkbox"/> |
| HEPATOLOGIE                 | <input type="checkbox"/> | <input type="checkbox"/> | <input type="checkbox"/> |
| DERMATOLOGIE/IST            | <input type="checkbox"/> | <input type="checkbox"/> | <input type="checkbox"/> |
| ENDOCRINOLOGIE/METABOLISME  | <input type="checkbox"/> | <input type="checkbox"/> | <input type="checkbox"/> |
| DIETETIQUE/NUTRITION        | <input type="checkbox"/> | <input type="checkbox"/> | <input type="checkbox"/> |
| CARDIOLOGIE                 | <input type="checkbox"/> | <input type="checkbox"/> | <input type="checkbox"/> |
| GYNECOLOGIE                 | <input type="checkbox"/> | <input type="checkbox"/> | <input type="checkbox"/> |
| PROCTOLOGIE                 | <input type="checkbox"/> | <input type="checkbox"/> | <input type="checkbox"/> |
| NEUROLOGIE                  | <input type="checkbox"/> | <input type="checkbox"/> | <input type="checkbox"/> |
| PSYCHIATRIE                 | <input type="checkbox"/> | <input type="checkbox"/> | <input type="checkbox"/> |
| DOULEUR                     | <input type="checkbox"/> | <input type="checkbox"/> | <input type="checkbox"/> |
| TABACOLOGIE                 | <input type="checkbox"/> | <input type="checkbox"/> | <input type="checkbox"/> |
| PSYCHOLOGIE                 | <input type="checkbox"/> | <input type="checkbox"/> | <input type="checkbox"/> |
| SOCIALE                     | <input type="checkbox"/> | <input type="checkbox"/> | <input type="checkbox"/> |
| ALCOOLOGIE                  | <input type="checkbox"/> | <input type="checkbox"/> | <input type="checkbox"/> |
| ADDICTION                   | <input type="checkbox"/> | <input type="checkbox"/> | <input type="checkbox"/> |
| SEXOLOGIE                   | <input type="checkbox"/> | <input type="checkbox"/> | <input type="checkbox"/> |
| CONTRACEPTION/PLANIFICATION | <input type="checkbox"/> | <input type="checkbox"/> | <input type="checkbox"/> |
| AUTRES                      | <input type="checkbox"/> | <input type="checkbox"/> | <input type="checkbox"/> |

**10. Est-ce que des associations ont des permanences dans votre service ?**

- ☐ Oui  
☐ Non

**10.1 Si oui, lesquelles :** \_\_\_\_\_

**11. Est-ce que des associations de personnes trans ont des permanences dans votre service ?**

- ☐ Oui  
☐ Non

**12. Y-a-t-il du matériel à disposition des usagers, dans le service ?**

- ☐ Piluliers  
☐ Préservatif externe (masculin)  
☐ Préservatif interne (féminin)  
☐ Gel lubrifiant  
☐ Seringues/aiguilles  
☐ Autre matériel de RDR (Roule-ta-paille, petit matériel d'injection etc.)  
☐ Autres, précisez : \_\_\_\_\_

**13. Des brochures spécifiques à destination des personnes trans sont-elles à disposition des usagers ?**

- ☐ Oui  
☐ Non

**14. Des brochures spécifiques à destination des PVVIH sont-elles à disposition des usagers ?**

- ☐ Oui  
☐ Non

**14.1 Si oui, à quelle fréquence sont-elles renouvelées ?**

- ☐ Mensuelle  
☐ Trimestrielle  
☐ Annuelle

**15. Existe-t-il des séances d'ETP (éducation thérapeutique à destination des patients) à destination des personnes vivant avec le VIH**

- ☐ Oui → **MERCI DE COMPLETER LA SECTION SUIVANTE**  
☐ Non → **FIN DU QUESTIONNAIRE**

## Section sur l'Education Thérapeutique du Patient

### 16. Qui assure les séances ?

- ☐ Infirmiers
- ☐ Médecins
- ☐ Psychologues
- ☐ Acteurs associatifs
- ☐ Pharmaciens
- ☐ Autre

### 17. Combien de séances d'ETP sont réalisées par semaine ?

- ☐ Entre 1 et 3
- ☐ Entre 3 et 5
- ☐ Plus de 5

### 18. Les séances sont-elles individuelles ou collectives ? (Plusieurs réponses possibles)

- ☐ Individuelles
- ☐ Collectives

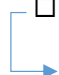

#### 18.1 Quel est le nombre moyen de participants par session ?

- ☐ Entre 1 et 5
- ☐ Entre 5 et 10
- ☐ Entre 10 et 15
- ☐ Plus de 15

### 19. Les entretiens sont proposés de façon :

- ☐ Régulière
- ☐ A la demande

**20. Les thèmes suivants sont-ils abordés durant les séances ?**

|                                                                                                        | Oui                      | Non                      |
|--------------------------------------------------------------------------------------------------------|--------------------------|--------------------------|
| Observance                                                                                             | <input type="checkbox"/> | <input type="checkbox"/> |
| Traitement                                                                                             | <input type="checkbox"/> | <input type="checkbox"/> |
| Schéma de prise                                                                                        | <input type="checkbox"/> | <input type="checkbox"/> |
| Confiance au médecin                                                                                   | <input type="checkbox"/> | <input type="checkbox"/> |
| Estime de soi                                                                                          | <input type="checkbox"/> | <input type="checkbox"/> |
| Qualité de vie                                                                                         | <input type="checkbox"/> | <input type="checkbox"/> |
| Environnement (famille, entourage, réseau relationnel, soutien social)                                 | <input type="checkbox"/> | <input type="checkbox"/> |
| Vie sexuelle                                                                                           | <input type="checkbox"/> | <input type="checkbox"/> |
| Hygiène de vie                                                                                         | <input type="checkbox"/> | <input type="checkbox"/> |
| Conduites à risque                                                                                     | <input type="checkbox"/> | <input type="checkbox"/> |
| Tabac                                                                                                  | <input type="checkbox"/> | <input type="checkbox"/> |
| Autres addictions/dépendances                                                                          | <input type="checkbox"/> | <input type="checkbox"/> |
| Perception des risques (recherche de sensation, impulsivité, prise de risque)                          | <input type="checkbox"/> | <input type="checkbox"/> |
| Connaissance des modes de transmission et méthodes de prévention du VIH (préservatif, TasP, TPE, PreP) | <input type="checkbox"/> | <input type="checkbox"/> |
| Connaissance des symptômes et moyens de dépistage de primo infection VIH et autres IST                 | <input type="checkbox"/> | <input type="checkbox"/> |
| Prévention des IST                                                                                     | <input type="checkbox"/> | <input type="checkbox"/> |
| Troubles psychiatriques                                                                                | <input type="checkbox"/> | <input type="checkbox"/> |
| Autre, précisez :                                                                                      | <input type="checkbox"/> | <input type="checkbox"/> |

**21. Qu'est-ce qui caractérise l'ETP, dans votre structure ?**

|                                                                              | Oui                      | Non                      |
|------------------------------------------------------------------------------|--------------------------|--------------------------|
| Une salle/box spécifique                                                     | <input type="checkbox"/> | <input type="checkbox"/> |
| Une collation durant les séances                                             | <input type="checkbox"/> | <input type="checkbox"/> |
| La possibilité de bénéficier d'un accompagnement en dehors des séances d'ETP | <input type="checkbox"/> | <input type="checkbox"/> |

MERCI DE VOTRE COLLABORATION
